# Supplementary material for: Structure of the HOPS tethering complex, a lysosomal membrane fusion machinery
Source: eLife journal article supplement (doi:10.7554/elife.80901), 2022-09-13
Supplement: supp [file 2022-04-11 Tethering assay_pYpt7-lipos_HOPS mutants_combined data.xlsx]

## Sheet: Sheet1
Data Set 1 (2022-03-24)									Combined data
	HOPS Vps41-FLAG									pYpt7-liposomes
	pYpt7-liposomes									HOPS
	HOPS									wt	Vps41ΔN	Vps11ΔN	Vps18ΔN	buffer
	wt	Vps41ΔN	Vps11ΔN	Vps18ΔN	buffer					77.0493	0.772554	58.3959	70.0048	0.203981
Average	77.0493	0.772554	58.3959	70.0048	0.203981					47.2919	4.73076	48.2793	42.7811	4.6825
Std dev	3.95644	1.74408	6.54907	2.47126	5.62034					40.2217	7.98489	33.4062	32.0187	5.27332
	liposomes								Average	54.8543	4.49607	46.6938	48.2682	3.3866
Average	-5.96189	1.25622	-0.00430586	-2.82855	4.81637				Std dev	19.5438	3.61189	12.5701	19.5785	2.77202
Std dev	4.93229	1.05267	5.52729	1.05272	2.89683
										liposomes
										HOPS
Data Set 2 (2022-04-08)										wt	Vps41ΔN	Vps11ΔN	Vps18ΔN	buffer
	HOPS Vps41-FLAG									-5.96189	1.25622	-0.00430586	-2.82855	4.81637
	pYpt7-liposomes									2.8605	7.0792	4.48689	1.72243	1.56254
	HOPS									4.99121	4.97849	3.10423	3.76512	4.32489
	wt	Vps41ΔN	Vps11ΔN	Vps18ΔN	buffer				Average	0.62994	4.43797	2.52894	0.886334	3.56793
Average	47.2919	4.73076	48.2793	42.7811	4.6825				Std dev	5.80725	2.94888	2.3002	3.37541	1.75402
Stddev	5.18308	1.75077	4.64477	3.91675	2.09309
	liposomes
Average	2.8605	7.0792	4.48689	1.72243	1.56254
Stddev	2.92818	3.66145	4.73472	3.68436	2.69073
Data Set 3 (2022-04-08)
	HOPS Vps41-FLAG
	pYpt7-liposomes
	HOPS
	wt	Vps41ΔN	Vps11ΔN	Vps18ΔN	buffer
Avarage	40.2217	7.98489	33.4062	32.0187	5.27332
Stddev	7.23939	3.07277	5.77021	4.75196	4.88243
	liposomes
Avarage	4.99121	4.97849	3.10423	3.76512	4.32489
Stddev	1.3953	4.92727	1.15561	0.782412	1.71724
								I38:I42
