# Supplementary material for: Structure of the HOPS tethering complex, a lysosomal membrane fusion machinery
Source: eLife journal article supplement (doi:10.7554/elife.80901), 2022-09-13
Supplement: supp [file 20220406_fusion_assay_HOPS_WT_vs_mutants_quantification.xlsx]

## Sheet: 20220406_fusion_assay_HOPS_WT_v
##BLOCKS= 1
Plate:	Lipo verif.	1					2					3
Time	Temperature(¡C)	no HOPS	WT	41 deltaN	11 deltaN	18 deltaN	no HOPS	WT	41 deltaN	11 deltaN	18 deltaN	no HOPS	WT	41 deltaN	11 deltaN	18 deltaN		time	no HOPS	WT	41 deltaN	11 deltaN	18 deltaN	time	no HOPS	WT	41 deltaN	11 deltaN	18 deltaN	time	no HOPS	WT	41 deltaN	11 deltaN	18 deltaN
00:00:00	27	57.161	55.385	63.204	61.433	61.155	54.794	54.715	57.955	64.878	59.239	54.773	53.422	51.774	56.54	52.418		0	1.04779	1.01031	1.07578	1.03058	1.04615	0	0.960489	0.947594	1.06576	1.02774	0.999629	0	1.01059	1.02368	0.971278	0.989067	0.975037
00:01:00	27	58.414	56.782	63.698	63.959	62.6	55.513	57.778	55.99	70.072	60.572	53.931	54.624	54.422	56.936	55.753		1	1.07076	1.03579	1.08418	1.07296	1.07087	1	0.973093	1.00064	1.02963	1.11002	1.02212	1	0.995055	1.04672	1.02095	0.995994	1.03707
00:02:00	27	57.278	57.102	63.976	64.715	62.125	55.542	56.539	59.506	65.094	61.841	58.191	56.465	51.916	55.128	54.889		2	1.04993	1.04163	1.08892	1.08564	1.06275	2	0.973601	0.979183	1.09428	1.03116	1.04354	2	1.07365	1.082	0.973942	0.964366	1.021
00:03:00	27	56.647	56.747	64.181	63.927	61.979	57.103	57.514	60.212	67.119	60.968	56.888	54.534	54.571	61.408	57.256		3	1.03837	1.03515	1.09241	1.07242	1.06025	3	1.00096	0.996069	1.10727	1.06324	1.0288	3	1.04961	1.04499	1.02375	1.07422	1.06503
00:04:00	27	56.978	57.543	62.876	62.518	61.712	57.754	58.014	58.263	67.549	61.945	56.057	58.059	57.05	60.315	55.096		4	1.04443	1.04967	1.07019	1.04878	1.05568	4	1.01238	1.00473	1.07142	1.07005	1.04529	4	1.03428	1.11254	1.07026	1.0551	1.02485
00:05:00	27	55.89	58.651	65.81	64.411	62.28	56.274	58.531	57.467	69.272	62.549	56.844	57.734	56.614	55.813	55.409		5	1.02449	1.06988	1.12013	1.08054	1.0654	5	0.986432	1.01368	1.05679	1.09734	1.05548	5	1.0488	1.10631	1.06208	0.976349	1.03067
00:06:00	27	58.007	57.205	66.314	63.766	61.194	57.415	56.751	62.223	65.579	61.05	54.118	58.318	52.782	58.289	54.238		6	1.0633	1.04351	1.12871	1.06972	1.04682	6	1.00643	0.982854	1.14425	1.03884	1.03019	6	0.998506	1.1175	0.990189	1.01966	1.00889
00:07:00	27	-0.121	-0.258	2.171	3.207	-0.266	1.286	-0.735	1.508	-0.95	-0.294	0.786	0.634	-1.582	-2.002	-1.335		7	-0.00221799	-0.00470631	0.0369519	0.0537997	-0.00455035	7	0.0225424	-0.0127293	0.0277313	-0.015049	-0.0049611	7	0.0145021	0.0121489	-0.0296783	-0.0350214	-0.0248326
00:08:00	27	-0.141	-0.027	0.097	4.25	1.949	0.974	1.381	0.186	-0.818	1.646	-1.219	-1.014	0.893	0.524	2.523		8	-0.0025846	-0.000492521	0.00165101	0.0712968	0.0333407	8	0.0170733	0.0239171	0.00342044	-0.012958	0.0277754	8	-0.0224912	-0.0194305	0.0167526	0.00916645	0.0469308
00:09:00	27	0.139	0.79	2.85	4.695	-0.254	1.078	-0.429	-1.432	1.792	0.924	-1.9	2.705	2.669	-2.795	-1.682		9	0.00254793	0.0144108	0.048509	0.078762	-0.00434507	9	0.0188964	-0.00742973	-0.0263337	0.0283872	0.015592	9	-0.035056	0.0518338	0.0500703	-0.0488936	-0.0312872
00:10:00	27	0.078	-0.972	1.92	2.487	0.036	-0.1	1.235	2.252	-0.293	-1.229	1.331	0.453	-2.999	3.561	0.972		10	0.00142978	-0.0177308	0.0326797	0.0417212	0.000615837	10	-0.00175291	0.0213886	0.041413	-0.00464144	-0.0207388	10	0.0245576	0.00868049	-0.0562611	0.0622934	0.0180804
00:11:00	27	54.554	54.82	58.752	59.61	58.457	57.048	57.741	54.379	63.127	59.261	54.199	52.186	53.305	57.165	53.76		11	1	1	1	1	1	11	1	1	1	1	1	11	1	1	1	1	1
00:12:00	27	54.453	56.074	61.14	57.429	58.485	56.83	55.696	54.576	66.236	57.746	56.823	54.761	51.954	52.491	50.822		12	0.998149	1.02287	1.04065	0.963412	1.00048	12	0.996179	0.964583	1.00362	1.04925	0.974435	12	1.04841	1.04934	0.974655	0.918237	0.94535
00:13:00	27	55.674	56.211	59.867	59.535	57.463	55.174	53.904	51.282	66.383	58.563	55.542	53.094	53.717	53.233	51.434		13	1.02053	1.02537	1.01898	0.998742	0.982996	13	0.96715	0.933548	0.943048	1.05158	0.988222	13	1.02478	1.0174	1.00773	0.931217	0.956734
00:14:00	27	54.594	59.645	59.009	60.882	61.141	57.212	55.18	59.755	66.317	57.553	59.288	55.679	49.742	58.372	53.801		14	1.00073	1.08802	1.00437	1.02134	1.04591	14	1.00287	0.955647	1.09886	1.05053	0.971178	14	1.09389	1.06693	0.933158	1.02111	1.00076
00:15:00	27	55.584	61.748	60.629	61.406	62.682	56.156	59.163	55.012	64.169	59.598	53.627	59.444	55.664	56.923	52.66		15	1.01888	1.12638	1.03195	1.03013	1.07228	15	0.984364	1.02463	1.01164	1.01651	1.00569	15	0.989446	1.13908	1.04425	0.995767	0.979539
00:16:00	27	53.729	62.516	56.357	61.869	59.449	54.701	59.306	58.599	63.719	56.784	55.654	58.455	49.38	59.045	53.321		16	0.984877	1.14039	0.959235	1.0379	1.01697	16	0.958859	1.0271	1.0776	1.00938	0.958202	16	1.02685	1.12013	0.926367	1.03289	0.991834
00:17:00	27	54.172	61.073	57.524	59.332	58.998	54.036	60.941	57.661	64.418	56.189	57.263	61.673	48.953	60.177	50.842		17	0.992998	1.11406	0.979099	0.995336	1.00925	17	0.947202	1.05542	1.06035	1.02045	0.948162	17	1.05653	1.18179	0.918357	1.05269	0.945722
00:18:00	27	53.646	62.786	58.955	62.662	60.909	53.721	61.95	52.382	63.427	59.272	53.269	65.364	50.362	54.437	50.913		18	0.983356	1.14531	1.00346	1.0512	1.04195	18	0.941681	1.07289	0.963276	1.00475	1.00019	18	0.982841	1.25252	0.944789	0.952278	0.947042
00:19:00	27	53.009	65.41	58.043	63.579	57.541	55.283	61.095	53.555	64.737	58.331	52.883	65.713	53.841	58.059	50.772		19	0.971679	1.19318	0.987932	1.06658	0.98433	19	0.969061	1.05809	0.984847	1.0255	0.984307	19	0.975719	1.25921	1.01006	1.01564	0.94442
00:20:00	27	54.074	66.091	56.365	57.955	57.333	53.883	62.19	56.447	64.584	56.99	55.039	72.205	50.407	54.756	46.703		20	0.991201	1.2056	0.959372	0.972236	0.980772	20	0.94452	1.07705	1.03803	1.02308	0.961678	20	1.0155	1.38361	0.945634	0.957859	0.868731
00:21:00	27	53.699	66.018	57.039	59.251	57.509	54.675	66.121	57.696	63.472	54.727	52.817	73.546	47.42	54.585	49.819		21	0.984327	1.20427	0.970844	0.993978	0.983783	21	0.958403	1.14513	1.061	1.00547	0.923491	21	0.974501	1.40931	0.889598	0.954867	0.926693
00:22:00	27	54.917	67.971	57.571	58.6	58.186	53.731	66.929	58.07	62.029	55.355	54.024	73.951	50.163	53.032	49.211		22	1.00665	1.23989	0.979899	0.983057	0.995364	22	0.941856	1.15912	1.06788	0.982606	0.934088	22	0.996771	1.41707	0.941056	0.927701	0.915383
00:23:00	27	51.885	68.736	59.06	60.307	58.675	52.614	64.292	50.956	63.14	59.447	50.628	74.974	46.39	55.035	52.309		23	0.951076	1.25385	1.00524	1.01169	1.00373	23	0.922276	1.11345	0.937053	1.00021	1.00314	23	0.934113	1.43667	0.870275	0.962739	0.97301
00:24:00	27	53.465	69.75	58.45	56.88	57.017	53.328	69.131	57.975	63.2	55.983	52.071	81.021	47.854	52.688	49.407		24	0.980038	1.27235	0.99486	0.954202	0.975367	24	0.934792	1.19726	1.06613	1.00116	0.944685	24	0.960737	1.55254	0.897739	0.921683	0.919029
00:25:00	27	52.814	70.781	58.04	58.4	57.555	53.78	65.681	53.353	64.587	56.879	51.629	79.64	51.377	50.192	47.566		25	0.968105	1.29115	0.987881	0.979701	0.98457	25	0.942715	1.13751	0.981132	1.02313	0.959805	25	0.952582	1.52608	0.963831	0.87802	0.884784
00:26:00	27	53.186	72.967	54.777	58.706	58.005	54.129	72.018	56.808	60.768	57.89	54.958	78.336	49.149	55.277	49.892		26	0.974924	1.33103	0.932343	0.984835	0.992268	26	0.948833	1.24726	1.04467	0.962631	0.976865	26	1.014	1.50109	0.922034	0.966973	0.928051
00:27:00	27	52.116	75.006	57.908	60.236	57.91	52.14	69.833	51.756	61.729	59.224	52.142	79.328	52.912	58.521	49.818		27	0.95531	1.36822	0.985635	1.0105	0.990643	27	0.913967	1.20942	0.951764	0.977854	0.999376	27	0.962047	1.5201	0.992627	1.02372	0.926674
00:28:00	27	51.89	77.027	55.278	58.632	61.037	51.88	72.876	52.311	60.722	59.172	53.724	80.112	48.969	59.989	53.762		28	0.951168	1.40509	0.94087	0.983593	1.04414	28	0.90941	1.26212	0.961971	0.961902	0.998498	28	0.991236	1.53512	0.918657	1.0494	1.00004
00:29:00	27	51.832	78.48	54.544	59.737	83.74	50.596	74.258	55.188	59.223	57.548	52.725	79.227	47.748	56.411	49.38		29	0.950104	1.43159	0.928377	1.00213	1	29	0.886902	1.28605	1.01488	0.938156	0.971094	29	0.972804	1.51817	0.895751	0.98681	0.918527
00:30:00	27	50.816	79.645	54.761	56.643	58.389	53.772	78.157	56.599	59.666	54.301	51.2	80.123	48.004	57.857	50.504		30	0.931481	1.45285	0.93207	0.950226	0.998837	30	0.942575	1.35358	1.04082	0.945174	0.916302	30	0.944667	1.53534	0.900553	1.01211	0.939435
00:31:00	27	51.817	79.711	59.946	57.362	54.742	52.89	74.874	53.637	65.231	57.105	52.539	83.965	51.355	51.905	47.731		31	0.94983	1.45405	1.02032	0.962288	0.936449	31	0.927114	1.29672	0.986355	1.03333	0.963619	31	0.969372	1.60896	0.963418	0.907986	0.887853
00:32:00	27	52.457	79.506	60.701	60.233	56.282	53.142	77.33	50.862	62.593	56.373	51.032	88.38	49.255	52.621	49.966		32	0.961561	1.45031	1.03317	1.01045	0.962793	32	0.931531	1.33926	0.935324	0.991541	0.951266	32	0.941567	1.69356	0.924022	0.920511	0.929427
00:33:00	27	51.165	82.771	58.354	60.112	56.779	54.246	78.212	51.792	62.909	58.041	49.252	90.542	52.701	52.216	48.872		33	0.937878	1.50987	0.993226	1.00842	0.971295	33	0.950883	1.35453	0.952426	0.996547	0.979413	33	0.908725	1.73499	0.988669	0.913426	0.909077
00:34:00	27	51.727	85.24	57.458	58.37	58.589	51.892	79.686	53.69	64.777	58.056	50.488	89.723	54.895	52.524	51.416		34	0.94818	1.55491	0.977975	0.979198	1.00226	34	0.90962	1.38006	0.98733	1.02614	0.979666	34	0.93153	1.71929	1.02983	0.918814	0.956399
00:35:00	27	53.082	88.902	59.918	60.12	56.993	53.201	82.888	52.759	65.806	57.106	50.637	92.956	52.288	51.82	51.482		35	0.973018	1.62171	1.01985	1.00856	0.974956	35	0.932566	1.43551	0.970209	1.04244	0.963635	35	0.934279	1.78124	0.980921	0.906499	0.957626
00:36:00	27	52.547	86.388	56.126	58.747	58.156	53.101	83.947	51.273	60.95	56.943	49.755	92.384	53.721	56.313	51.151		36	0.963211	1.57585	0.955304	0.985523	0.994851	36	0.930813	1.45385	0.942882	0.965514	0.960885	36	0.918006	1.77028	1.0078	0.985096	0.951469
00:37:00	27	52.125	88.553	54.633	59.901	58.893	53.408	85.695	52.066	59.969	55.23	53.171	86.277	46.899	59.833	50.973		37	0.955475	1.61534	0.929892	1.00488	1.00746	37	0.936194	1.48413	0.957465	0.949974	0.931979	37	0.981033	1.65326	0.879824	1.04667	0.948158
00:38:00	27	51.655	88.752	58.361	59.354	57.107	51.319	83.87	52.342	63.226	58.471	50.561	90.299	52.986	51.395	49.807		38	0.94686	1.61897	0.993345	0.995705	0.976906	38	0.899576	1.45252	0.962541	1.00157	0.986669	38	0.932877	1.73033	0.994016	0.899064	0.926469
00:39:00	27	51.16	90.548	55.865	59.683	56.758	54.531	88.752	52.174	61.186	58.573	51.222	92.802	52.252	57.874	55.434		39	0.937786	1.65173	0.950861	1.00122	0.970936	39	0.955879	1.53707	0.959451	0.969252	0.98839	39	0.945073	1.77829	0.980246	1.0124	1.03114
00:40:00	27	51.226	92.615	55.761	58.652	56.305	53.37	87.679	54.232	60.826	55.921	54.443	88.74	46.83	58.025	53.516		40	0.938996	1.68944	0.949091	0.983929	0.963187	40	0.935528	1.51849	0.997297	0.96355	0.943639	40	1.0045	1.70046	0.878529	1.01504	0.995461
00:41:00	27	52.568	94.516	58.023	58.917	58.192	53.42	90.698	52.208	60.022	58.579	50.573	91.184	53.199	57.127	54.72		41	0.963596	1.72412	0.987592	0.988374	0.995467	41	0.936404	1.57077	0.960077	0.950813	0.988492	41	0.933098	1.74729	0.998011	0.999335	1.01786
00:42:00	27	51.725	95.169	55.941	59.727	57.099	53.487	89.403	53.052	61.436	58.178	49.678	95.308	53.325	55.225	54.802		42	0.948143	1.73603	0.952155	1.00196	0.976769	42	0.937579	1.54835	0.975597	0.973213	0.981725	42	0.916585	1.82631	1.00038	0.966063	1.01938
00:43:00	27	52.588	93.699	56.866	59.484	56.274	50.733	91.379	53.606	64.208	54.703	53.723	93.767	51.561	52.122	48.721		43	0.963962	1.70921	0.967899	0.997886	0.962656	43	0.889304	1.58257	0.985785	1.01712	0.923086	43	0.991218	1.79678	0.967283	0.911782	0.906269
00:44:00	27	51.593	98.607	54.941	57.626	57.825	55.034	93.958	54.477	60.55	57.312	53.113	93.603	51.633	61.621	53.32		44	0.945724	1.79874	0.935134	0.966717	0.989189	44	0.964696	1.62723	1.0018	0.959178	0.967112	44	0.979963	1.79364	0.968633	1.07795	0.991815
00:45:00	27	51.938	98.366	60.172	58.949	54.993	50.287	91.655	52.316	63.759	57.372	52.567	94.389	49.268	55.887	49.546		45	0.952048	1.79435	1.02417	0.988911	0.940743	45	0.881486	1.58735	0.962063	1.01001	0.968124	45	0.969889	1.8087	0.924266	0.977644	0.921615
00:46:00	27	52.064	94.554	54.301	58.283	57.753	53.201	95.709	54.76	60.948	55.41	53.861	90.224	46.624	60.601	53.529		46	0.954357	1.72481	0.924241	0.977739	0.987957	46	0.932566	1.65756	1.00701	0.965482	0.935016	46	0.993764	1.72889	0.874665	1.06011	0.995703
00:47:00	27	52.418	97.371	56.776	58.409	57.332	54.115	93.255	51.632	62.887	60.171	53.353	99.135	51.999	55.356	55.159		47	0.960846	1.77619	0.966367	0.979852	0.980755	47	0.948587	1.61506	0.949484	0.996198	1.01536	47	0.984391	1.89965	0.975499	0.968355	1.02602
00:48:00	27	53.268	100.272	55.796	60.22	57.792	53.622	97.308	54.378	60.046	56.121	51.534	93.197	52.365	61.339	54.378		48	0.976427	1.82911	0.949687	1.01023	0.988624	48	0.939945	1.68525	0.999982	0.951194	0.947014	48	0.950829	1.78586	0.982366	1.07302	1.0115
00:49:00	27	52.143	98.786	56.305	58.343	56.199	52.23	97.839	55.693	63.935	55.958	53.503	94.444	48.434	62.43	55.168		49	0.955805	1.80201	0.95835	0.978745	0.961373	49	0.915545	1.69445	1.02416	1.0128	0.944264	49	0.987158	1.80976	0.90862	1.0921	1.02619
00:50:00	27	53.363	99.44	59.387	58.736	55.844	50.999	96.351	54.173	65.624	57.363	52.974	94.6	47.29	53.962	49.978		50	0.978168	1.81394	1.01081	0.985338	0.9553	50	0.893966	1.66868	0.996212	1.03956	0.967972	50	0.977398	1.81275	0.887159	0.943969	0.92965
00:51:00	27	52.1	98.915	55.903	58.375	57.45	52.381	99.209	54.219	64.175	56.904	55.997	95.552	47.513	58.017	50.599		51	0.955017	1.80436	0.951508	0.979282	0.982774	51	0.918192	1.71817	0.997058	1.0166	0.960227	51	1.03317	1.83099	0.891342	1.0149	0.941202
00:52:00	27	52.312	99.755	57.453	58.616	58.407	52.574	99.304	54.514	63.876	55.226	54.758	95.727	47.987	56.432	50.322		52	0.958903	1.81968	0.97789	0.983325	0.999145	52	0.921575	1.71982	1.00248	1.01186	0.931911	52	1.01031	1.83434	0.900234	0.987177	0.936049
00:53:00	27	54.077	100.107	54.732	59.816	58.235	53.096	98.915	55.506	62.774	56.196	53.763	93.182	55.637	59.166	54.021		53	0.991256	1.8261	0.931577	1.00346	0.996202	53	0.930725	1.71308	1.02072	0.994408	0.94828	53	0.991956	1.78557	1.04375	1.035	1.00485
00:54:00	27	52.38	100.033	59.657	57.59	57.792	52.054	99.884	52.137	65.077	59.159	52.964	98.192	47.955	54.97	51.303		54	0.96015	1.82475	1.0154	0.966113	0.988624	54	0.91246	1.72986	0.958771	1.03089	0.998279	54	0.977214	1.88158	0.899634	0.961602	0.954297
00:55:00	27	52.983	101.66	54.745	61.091	59.164	51.785	100.315	56.124	61.985	55.549	53.716	96.099	49.529	62.767	56.965		55	0.971203	1.85443	0.931798	1.02484	1.01209	55	0.907744	1.73733	1.03209	0.981909	0.937362	55	0.991088	1.84147	0.929162	1.098	1.05962
00:56:00	27	52.78	100.118	55.678	58.373	58.012	52.892	101.527	56.385	61.883	55.638	55.414	94.248	48.087	59.09	52.555		56	0.967482	1.8263	0.947678	0.979248	0.992388	56	0.927149	1.75832	1.03689	0.980294	0.938864	56	1.02242	1.806	0.90211	1.03367	0.977586
00:57:00	27	51.751	99.767	58.078	59.542	57.937	52.966	95.965	49.814	66.63	60.468	47.446	97.92	53.212	54.061	52.574		57	0.94862	1.8199	0.988528	0.998859	0.991105	57	0.928446	1.66199	0.916052	1.05549	1.02037	57	0.875404	1.87637	0.998255	0.945701	0.977939
00:58:00	27	52.687	102.7	54.204	61.061	59.86	53.212	101.842	54.24	60.902	58.101	52.132	96.135	50.078	61.601	55.573		58	0.965777	1.8734	0.92259	1.02434	1.024	58	0.932758	1.76377	0.997444	0.964754	0.980426	58	0.961863	1.84216	0.939462	1.0776	1.03372
00:59:00	27	51.719	102.656	59.245	61.198	57.902	51.802	98.545	51.145	67.475	59.756	48.086	99.282	55.064	56.884	53.351		59	0.948033	1.8726	1.00839	1.02664	0.990506	59	0.908042	1.70667	0.940529	1.06888	1.00835	59	0.887212	1.90246	1.033	0.995084	0.992392
01:00:00	27	53.268	104.289	55.156	62.266	57.061	51.802	102.619	55.761	63	56.317	53.742	95.859	49.088	62.649	55.817		60	0.976427	1.90239	0.938794	1.04456	0.976119	60	0.908042	1.77723	1.02541	0.997988	0.950321	60	0.991568	1.83687	0.920889	1.09593	1.03826
01:01:00	27	52.841	103.309	56.241	61.335	57.578	54.38	102.914	55.452	66.115	56.339	55.105	97.524	48.573	57.101	51.662		61	0.9686	1.88451	0.957261	1.02894	0.984963	61	0.953232	1.78234	1.01973	1.04733	0.950693	61	1.01672	1.86878	0.911228	0.99888	0.960975
01:02:00	27	52.595	101.382	55.142	62.234	57.704	51.543	100.669	54.239	62.584	56.861	51.36	93.776	50.446	62.529	54.448		62	0.964091	1.84936	0.938555	1.04402	0.987119	62	0.903502	1.74346	0.997425	0.991398	0.959501	62	0.947619	1.79696	0.946365	1.09383	1.0128
01:03:00	27	52.775	104.13	53.554	62.498	58.804	52.206	104.853	55.978	63.252	55.424	54.643	97.295	47.681	58.403	57.148		63	0.96739	1.89949	0.911526	1.04845	1.00594	63	0.915124	1.81592	1.0294	1.00198	0.935253	63	1.00819	1.86439	0.894494	1.02166	1.06302
01:04:00	27	53.032	103.572	58.517	60.862	58.423	50.945	100.949	50.687	66.041	60.835	52.599	100.714	50.482	58.475	55.377		64	0.972101	1.88931	0.996	1.021	0.999418	64	0.89302	1.74831	0.932106	1.04616	1.02656	64	0.970479	1.9299	0.947041	1.02292	1.03008
01:05:00	27	53.379	103.171	60.203	60.127	56.963	53.667	103.712	57.397	65.387	56.902	54.941	100.678	48.52	56.21	50.742		65	0.978462	1.882	1.0247	1.00867	0.974443	65	0.940734	1.79616	1.0555	1.0358	0.960193	65	1.01369	1.92921	0.910234	0.983294	0.943862
01:06:00	27	53.044	102.455	58.26	58.741	61.087	53.679	103.081	53.636	65.672	56.212	55.495	96.796	50.14	56.966	54.127		66	0.972321	1.86893	0.991626	0.985422	1.04499	66	0.940944	1.78523	0.986337	1.04032	0.94855	66	1.02391	1.85483	0.940625	0.996519	1.00683
01:07:00	27	52.867	102.814	58.599	60.466	59.126	51.608	100.987	50.137	66.54	59.303	50.707	101.455	55.119	54.392	53.073		67	0.969077	1.87548	0.997396	1.01436	1.01144	67	0.904642	1.74897	0.921992	1.05407	1.00071	67	0.935571	1.9441	1.03403	0.951491	0.987221
01:08:00	27	52.773	102.426	59.288	58.028	56.58	53.348	102.849	52.528	65.06	59.411	54.223	99.454	51.048	59.097	50.595		68	0.967353	1.86841	1.00912	0.973461	0.967891	68	0.935142	1.78121	0.965961	1.03062	1.00253	68	1.00044	1.90576	0.957659	1.0338	0.941127
01:09:00	27	52.87	103.716	58.54	59.936	58.466	52.822	103.711	56.895	64.668	54.351	55.44	98.281	48.795	55.961	52.354		69	0.969132	1.89194	0.996392	1.00547	1.00015	69	0.925922	1.79614	1.04627	1.02441	0.917146	69	1.0229	1.88328	0.915393	0.978938	0.973847
01:10:00	27	53.468	102.358	56.962	61.753	57.104	53.611	104.112	57.793	63.408	55.927	51.39	98.261	50.958	57.821	53.32		70	0.980093	1.86717	0.969533	1.03595	0.976855	70	0.939752	1.80309	1.06278	1.00445	0.94374	70	0.948172	1.8829	0.95597	1.01148	0.991815
01:11:00	27	54.17	105.01	59.494	60.234	57.957	52.076	102.03	50.57	66.109	59.106	51.817	99.992	54.677	55.019	53.522		71	0.992961	1.91554	1.01263	1.01047	0.991447	71	0.912845	1.76703	0.929955	1.04724	0.997384	71	0.956051	1.91607	1.02574	0.96246	0.995573
01:12:00	27	53.796	102.907	56.48	60.189	57.181	54.888	104.762	58.119	64.601	58.13	53.475	97.94	51.208	61.682	54.404		72	0.986106	1.87718	0.961329	1.00971	0.978172	72	0.962137	1.81434	1.06878	1.02335	0.980915	72	0.986642	1.87675	0.96066	1.07902	1.01198
01:13:00	27	53.225	102.373	56.902	64.482	59.113	53.854	104.601	51.921	66.077	59.614	48.714	99.151	52.368	60.09	58.099		73	0.975639	1.86744	0.968512	1.08173	1.01122	73	0.944012	1.81156	0.954799	1.04673	1.00596	73	0.898799	1.89995	0.982422	1.05117	1.08071
01:14:00	27	53.951	104.905	58.884	63.391	57.014	52.595	106.221	52.923	66.734	58.583	49.581	99.682	54.901	63.555	54.836		74	0.988947	1.91363	1.00225	1.06343	0.975315	74	0.921943	1.83961	0.973225	1.05714	0.988559	74	0.914795	1.91013	1.02994	1.11178	1.02001
01:15:00	27	53.048	101.612	58.433	61.234	56.922	53.511	105.426	50.135	65.072	59.545	52.719	102.947	49.153	60.048	54.796		75	0.972394	1.85356	0.99457	1.02724	0.973741	75	0.938	1.82584	0.921955	1.03081	1.00479	75	0.972693	1.97269	0.922109	1.05043	1.01927
01:16:00	27	54.131	103.171	55.544	63.595	60.253	51.38	100.841	50.335	65.329	61.592	48.126	98.013	53.477	61.741	57.236		76	0.992246	1.882	0.945398	1.06685	1.03072	76	0.900645	1.74644	0.925633	1.03488	1.03933	76	0.88795	1.87815	1.00323	1.08005	1.06466
01:17:00	27	53.544	104.77	60.277	63.431	58.235	52.17	104.951	50.464	67.632	57.909	52.597	102.687	53.473	61.723	56.869		77	0.981486	1.91116	1.02596	1.0641	0.996202	77	0.914493	1.81762	0.928005	1.07136	0.977186	77	0.970442	1.96771	1.00315	1.07973	1.05783
01:18:00	27	53.862	101.639	59.798	65.662	58.875	53.792	105.882	53.343	64.238	58.065	54.935	96.318	49.103	62.241	55.048		78	0.987315	1.85405	1.0178	1.10153	1.00715	78	0.942925	1.83374	0.980949	1.0176	0.979818	78	1.01358	1.84567	0.921171	1.0888	1.02396
01:19:00	27	54.215	101.79	60.888	62.061	57.382	51.703	99.987	49.724	67.724	60.755	51.165	102.194	54.243	57.095	54.077		79	0.993786	1.8568	1.03636	1.04112	0.98161	79	0.906307	1.73165	0.914397	1.07282	1.02521	79	0.944021	1.95826	1.0176	0.998775	1.0059
01:20:00	27	54.47	103.965	56.453	62.582	60.219	52.352	107.61	57.15	65.673	57.438	54.832	97.929	51.408	62.114	53.653		80	0.99846	1.89648	0.960869	1.04986	1.03014	80	0.917683	1.86367	1.05096	1.04033	0.969238	80	1.01168	1.87654	0.964412	1.08657	0.99801
01:21:00	27	53.709	102.039	57.266	62.84	59.283	52.622	105.699	54.002	66.979	57.163	53.597	100.311	50.579	60.621	54.418		81	0.984511	1.86135	0.974707	1.05419	1.01413	81	0.922416	1.83057	0.993067	1.06102	0.964597	81	0.988893	1.92218	0.94886	1.06046	1.01224
01:22:00	27	54.103	104.823	55.424	64.421	61.866	53.808	109.264	55.155	66.631	57.152	54.194	97.844	49.766	62.953	57.708		82	0.991733	1.91213	0.943355	1.08071	1.05832	82	0.943206	1.89231	1.01427	1.05551	0.964412	82	0.999908	1.87491	0.933608	1.10125	1.07344
01:23:00	27	53.294	103.806	55.57	65.114	61.859	52.951	108.283	55.052	65.727	60.4	51.652	100.46	52.877	61.229	58.041		83	0.976904	1.89358	0.94584	1.09233	1.0582	83	0.928183	1.87532	1.01238	1.04119	1.01922	83	0.953007	1.92504	0.991971	1.07109	1.07963
01:24:00	27	52.624	105.937	58.745	63.967	59.538	53.862	105.707	54.325	69.638	60.637	51.02	103.695	54.015	58.816	60.257		84	0.964622	1.93245	0.999881	1.07309	1.01849	84	0.944152	1.83071	0.999007	1.10314	1.02322	84	0.941346	1.98703	1.01332	1.02888	1.12085
01:25:00	27	53.046	105.172	55.921	64.257	61.377	53.552	110.463	57.187	65.105	58.062	54.97	100.456	54.363	56.189	52.755		85	0.972358	1.9185	0.951814	1.07796	1.04995	85	0.938718	1.91308	1.05164	1.03133	0.979767	85	1.01423	1.92496	1.01985	0.982927	0.981306
01:26:00	27	53.908	103.139	53.193	63.952	61.429	55.654	108.875	54.093	64.351	60.693	53.358	98.653	53.496	62.01	60.463		86	0.988159	1.88141	0.905382	1.07284	1.05084	86	0.975564	1.88558	0.994741	1.01939	1.02416	86	0.984483	1.89041	1.00358	1.08475	1.12468
01:27:00	27	54.673	105.857	61.369	66.419	58.942	53.293	109.851	55.786	66.228	57.138	52.897	98.897	49.008	64.228	57.55		87	1.00218	1.93099	1.04454	1.11423	1.0083	87	0.934178	1.90248	1.02587	1.04912	0.964175	87	0.975977	1.89509	0.919388	1.12355	1.0705
01:28:00	27	53.245	103.621	55.383	62.11	60.045	53.141	111.15	55.567	65.114	56.68	50.908	97.187	49.811	61.03	55.992		88	0.976005	1.8902	0.942657	1.04194	1.02717	88	0.931514	1.92498	1.02185	1.03148	0.956447	88	0.939279	1.86232	0.934453	1.06761	1.04152
01:29:00	27	53.532	102.773	55.215	65.26	59.726	55.015	108.041	55.972	64.977	57.687	54.142	98.219	52.184	65.674	55.689		89	0.981266	1.87474	0.939798	1.09478	1.02171	89	0.964363	1.87113	1.02929	1.02931	0.97344	89	0.998948	1.88209	0.97897	1.14885	1.03588
01:30:00	27	54.69	105.684	59.302	64.039	58.502	53.051	106.556	52.006	68.835	58.819	49.285	105.716	54.787	58.649	56.382		90	1.00249	1.92784	1.00936	1.0743	1.00077	90	0.929936	1.84541	0.956362	1.09042	0.992541	90	0.909334	2.02575	1.0278	1.02596	1.04877
00:00:00	27	1295.06	1255.12	1296.24	1242.02	1288.95	1190.18	1179.58	1229.48	1270.58	1183.09	1155.96	1144.48	1145.54	1176.36	1234.95
00:01:00	27	1277.54	1233.89	1294.72	1237.29	1272.69	1185.11	1171	1228.18	1258.26	1177.28	1149.32	1141.34	1137.47	1174.62	1223.71
00:02:00	27	1256.23	1230.16	1285.95	1216.19	1263.56	1173.95	1162.49	1211.84	1247.52	1165.75	1134.91	1138.21	1131.72	1168.01	1215.01
00:03:00	27	1249.13	1212.23	1270.3	1219.68	1252.05	1158.58	1156.69	1210.63	1239.08	1151.93	1133.52	1124.07	1122.86	1162.01	1214.51
00:04:00	27	1236.01	1212.46	1266.69	1206.57	1247.54	1153.92	1154.73	1198.34	1230.25	1147.15	1121.87	1121.98	1124.59	1158.97	1203.91
00:05:00	27	1221.87	1205.38	1259.86	1197.06	1248.13	1152.07	1144.99	1202.31	1225.68	1143.88	1117.72	1117.17	1119.97	1160.51	1203.25
00:06:00	27	1235.4	1206.17	1254.32	1198.84	1241.36	1146.13	1151.55	1196.11	1226.72	1145.98	1131.93	1121.73	1121	1167.35	1202.37
00:07:00	27	-0.129	3.07	5.88	6.69	0.613	3.373	7.966	5.571	-0.71	3.679	0.126	4.211	2.437	1.42	1.362
00:08:00	27	3.939	1.249	10.27	9.659	1.248	8.274	10.812	5.186	-0.058	-2.548	-0.343	0.876	2.875	-0.336	1.25
00:09:00	27	-2.164	1.878	8.069	6.692	3.482	#SAT	8.922	5.609	1.533	1.449	1.879	3.627	-0.398	0.082	1.493
00:10:00	27	#SAT	3.81	10.013	9.797	1.003	1.561	9.981	4.388	2.892	1.907	1.086	2.631	2.749	1.88	1.541
00:11:00	27	981.033	1014.6	1106.49	999.342	1038.07	956.437	992.854	993.586	1041.59	979.334	926.914	931.81	940.026	993.206	1034.22
00:12:00	27	998.653	1029.57	1094.38	989.044	1049.07	941.671	984.615	991.234	1044.88	973.394	920.149	933.777	936.375	999.003	1028.67
00:13:00	27	980.646	1037.4	1092.32	993.677	1045.46	945.143	981.919	989.459	1039.11	977.872	912.486	925.376	923.195	990.132	1025.27
00:14:00	27	1027.84	1070.49	1132.47	1039.81	1105.51	943.601	971.881	1035.29	1072.48	988.995	938.308	949.083	932.028	1044.56	1047.85
00:15:00	27	1009.9	1043.4	1115.21	1021.54	1090.3	936.608	943.463	1022.89	1056.89	974.274	927.262	936.63	938.44	1027.26	1033.24
00:16:00	27	996.085	1028.52	1101.64	1017.1	1072.66	923.405	926.852	1009.35	1039.81	965.335	926.125	917.497	916.703	1007.25	1008.32
00:17:00	27	977.517	1002.39	1095.92	1004.76	1069.93	933.136	920.644	998.573	1041.49	956.06	900.567	902.311	917.373	1006.42	992.005
00:18:00	27	969.895	972.373	1070.97	1004.35	1054.29	930.655	896.884	988.679	1020.58	946.487	897.448	875.754	908.188	986.791	983.282
00:19:00	27	968.868	966.653	1089.86	1001.14	1045.05	934.645	892.51	989.699	1018.73	951.491	899.746	854.97	905.458	994.026	975.516
00:20:00	27	976.176	949.083	1081.76	994.333	1040.02	918.37	896.222	982.178	1012.93	954.674	900.11	840.517	909.326	989.945	977.29
00:21:00	27	978.883	941.976	1067.19	989.396	1047.27	915.55	885.259	981.038	1020.38	948.084	891.753	830.51	913.559	979.03	969.137
00:22:00	27	980.428	937.656	1081.51	986.518	1037.54	919.414	864.493	982.236	1023.82	953.554	885.698	836.08	917.565	980.859	964.411
00:23:00	27	959.942	904.385	1057.9	979.158	1019.38	906.955	860.457	975.147	1002.28	953.857	876.295	811.664	901.463	965.563	951.403
00:24:00	27	974.009	889.277	1059.09	977.863	1028.2	898.509	853.758	980.466	998.182	941.61	875.713	796.681	904.349	960.841	946.09
00:25:00	27	951.721	885.463	1062.58	968.737	1016.47	907.06	836.289	961.623	987.462	945.898	865.453	779.623	902.273	955.593	946.051
00:26:00	27	969.416	870.265	1061.64	975.584	1031.73	906.189	844.004	966.569	992.452	939.366	881.188	787.214	904.89	964.424	957.186
00:27:00	27	953.256	852.451	1049.19	961.884	1022.13	904.867	824.936	957.655	978.755	937.047	876.164	771.73	897.687	951.845	938.384
00:28:00	27	957.419	848.627	1055.74	966.342	1017.3	904.699	824.794	968.166	969.9	938.75	875.368	772.423	897.172	962.443	949.843
00:29:00	27	951.91	842.985	1040.78	962.556	1022.98	890.493	813.819	962.58	970.022	923.065	881.281	763.769	888.015	956.503	941.857
00:30:00	27	952.552	831.518	1045.42	954.989	1014.65	902.006	806.645	958.218	976.401	929.958	874.091	762.658	899.88	953.647	943.742
00:31:00	27	944.14	821.108	1042.97	953.604	1011.27	889.477	791.717	951.809	964.359	921.858	875.341	755.129	895.457	965.38	938.559
00:32:00	27	931.282	809.688	1035.7	950.695	1007.83	889.801	785.603	954.383	967.201	915.089	861.34	752.002	886.077	950.139	935.138
00:33:00	27	937.195	804.09	1031.4	950.918	1008.47	888.097	779.825	954.799	966.415	920.332	865.974	747.956	899.91	954.486	939.661
00:34:00	27	940.805	797.225	1036.54	952.19	1000.93	893.599	774.48	950.646	967.685	920.372	874.061	742.968	886.376	956.648	942.982
00:35:00	27	938.648	800.054	1037.24	953.34	1007.48	899.479	775.166	964.762	978.183	925.698	871.058	742.816	894.512	950.36	944.206
00:36:00	27	938.068	789.602	1035.66	952.867	1001.98	890.514	769.531	954.213	979.748	920.715	868.674	741.829	898.782	945.354	943.062
00:37:00	27	954.891	794.001	1051.43	961.209	1006.59	891.708	770.27	968.549	974.067	923.358	869.804	750.121	907.716	963.633	946.604
00:38:00	27	931.419	777.562	1038.06	948.303	1002.53	891.592	752.143	957.915	971.612	916.958	868.372	731.949	906.955	951.432	945.096
00:39:00	27	945.176	770.822	1038.94	954.326	998.74	898.39	754.245	970.347	971.341	918.535	871.14	733.295	900.059	955.825	947.828
00:40:00	27	949.739	768.15	1039.4	942.466	994.627	883.18	737.313	955.85	971.095	910.376	865.012	729.731	900.78	945.122	938.19
00:41:00	27	941.599	759.729	1048.06	955.067	1002.82	892.204	737.875	968.904	961.155	918.612	871.632	718.799	897.255	950.417	936.823
00:42:00	27	943.503	756.394	1041.78	958.05	1009.46	891.816	734.064	970.294	976.15	920.806	867.199	726.408	907.226	952.447	943.451
00:43:00	27	946.056	753.513	1034.13	953.179	994.859	894.027	731.785	959.594	970.516	921.575	867.797	714.77	906.095	956.505	950.575
00:44:00	27	954.024	752.365	1051.3	951.938	1002.89	897.134	728.328	963.624	969.133	921.928	864.491	725.164	903.818	945.815	944.19
00:45:00	27	944.13	735.74	1037.69	944.012	1000.98	883.452	716.5	953.688	966.997	921.919	859.94	714.612	900.219	948.364	934.628
00:46:00	27	954.896	741.121	1050.72	947.716	1000.63	889.573	716.255	960.104	969.072	911.603	858.895	712.384	902.146	946.463	942.057
00:47:00	27	949.252	736.166	1047.32	944.293	999.249	895.94	716.337	964.147	962.098	914.265	869.235	711.852	901.783	944.736	940.773
00:48:00	27	961.053	739.571	1053.66	954.822	999.303	896.068	710.634	966.734	970.177	915.704	869.499	715.358	911.368	948.752	942.993
00:49:00	27	953.573	734.943	1044.81	946.008	992.511	884.965	702.521	965.062	972.549	916.461	864.693	712.197	909.816	947.395	947.335
00:50:00	27	961.12	729.939	1037.28	942.075	991.835	884.03	702.399	959.868	966.94	912.27	865.222	706.863	904.031	951.233	937.951
00:51:00	27	964.13	732.79	1044.63	951.258	998.266	886.362	699.495	965.827	970.965	922.315	865.064	707.043	915.051	955.185	951.013
00:52:00	27	974.216	740.552	1053.99	946.006	997.265	889.399	699.331	972.831	976.528	927.613	872.737	709.534	915.704	952.832	943.26
00:53:00	27	967.457	727.781	1048.59	946.556	983.385	883.121	694.428	959.12	968.236	918.668	864.955	698.787	909.589	947.131	936.496
00:54:00	27	966.608	728.594	1049.41	947.477	1000.16	887.627	692.305	965.545	966.559	914.93	867.988	708.496	910.845	946.672	939.398
00:55:00	27	958.368	722.596	1052.87	945.259	989.67	898.951	690.387	966.046	969.18	910.483	865.899	700.222	907.404	946.269	934.143
00:56:00	27	968.387	724.075	1051.99	945.555	995.384	898.388	685.445	969.758	964.315	914.491	867.992	700.702	907.297	941.238	939.172
00:57:00	27	947.566	709.727	1038.01	937.88	980.658	889.218	674.655	949.88	963.374	915.646	860.465	698.142	912.964	940.157	931.596
00:58:00	27	963.696	715.841	1057.41	948.403	997.683	902.381	684.371	969.552	974.357	918.105	877.21	696.947	908.696	946.868	940.714
00:59:00	27	966.261	714.091	1054.01	947.712	990.07	893.871	680.777	965.743	970.245	912.195	871.689	700.482	911.971	942.405	935.289
01:00:00	27	967.09	711.462	1051.35	943.587	986.947	891.744	676.654	970.065	966.245	922.948	865.714	697.391	909.879	940.511	940.605
01:01:00	27	978.668	709.433	1062.25	951.492	999.698	890.32	679.264	972.167	975.899	915.916	873.081	702.121	916.983	949.93	942.953
01:02:00	27	954.408	709.151	1049.48	933.155	991.545	899.026	666.154	968.749	961.386	908.616	872.156	698.451	907.164	936.609	934.271
01:03:00	27	980.953	709.867	1057.13	945.199	989.493	891.669	668.245	973.302	976.103	914.472	870.202	699.31	922.901	946.305	940.374
01:04:00	27	965.832	702.876	1054.3	941.24	988.764	900.594	667.801	964.241	961.453	913.899	873.625	689.039	917.514	939.85	933.941
01:05:00	27	962.459	712.841	1059.5	946.3	999.765	909.373	672.026	978.094	980.684	918.36	877.694	693.488	917.273	947.87	942.705
01:06:00	27	975.317	704.52	1062.09	942.083	995.837	897.95	667.787	971.749	980.476	919.423	880.356	700.769	912.456	943.177	950.89
01:07:00	27	972.929	704.365	1057.78	938.557	988.098	899.817	668.52	969.194	978.19	911.447	875.316	702.669	914.621	939.212	946.393
01:08:00	27	970.299	709.754	1048.73	942.424	983.236	895.274	667.462	970.792	964.496	916.9	871.359	687.139	913.269	939.152	936.637
01:09:00	27	981.868	709.588	1058.59	946.823	993.315	900.923	668.846	977.181	979.179	912.067	878.753	694.984	914.268	946.928	941.621
01:10:00	27	979.615	707.149	1043.21	933.597	992.458	911.118	658.581	975.054	970.314	915.406	877.902	683.961	910.304	937.126	935.201
01:11:00	27	975.752	704.845	1059.64	941.156	990.052	901.852	669.317	973.014	981.02	918.712	875.344	694.659	923.251	943.407	944.476
01:12:00	27	981.328	698.549	1057.19	946.029	987.889	912.47	667.066	966.263	968.244	914.295	880.212	687.103	924.005	938.29	947.148
01:13:00	27	975.312	699.592	1059.09	943.287	984.007	908.303	669.637	973.92	971.233	919.295	885.753	692.068	917.685	945.696	937.418
01:14:00	27	975.585	699.096	1057.93	934.483	993.885	910.062	660.241	978.67	973.351	917.519	881.068	690.226	922.482	942.588	941.034
01:15:00	27	980.154	697.504	1055.7	941.562	983.848	915.851	660.628	971.094	969.002	917.497	879.57	691.119	928.602	936.504	939.46
01:16:00	27	965.541	692.021	1044.29	928.289	975.724	908.47	658.757	968.823	965.955	908.058	879.738	686.978	911.307	935.138	930.483
01:17:00	27	971.227	691.842	1055.19	940.148	986.984	907.367	657.7	980.417	977.263	913.32	875.595	686.348	921.676	942.461	940.775
01:18:00	27	975.744	695.69	1059.55	941.219	989.013	917.847	654.07	974.757	976.637	915.541	884.498	693.07	923.22	938.659	943.94
01:19:00	27	980.983	687.941	1047.04	929.226	970.965	910.806	657.128	966.469	967.318	906.337	879.102	686.886	917.241	939.976	947.781
01:20:00	27	995.946	695.598	1065.64	942.504	991.658	901.622	660.608	974.842	988.14	916.939	888.551	695.377	919.712	940.416	947.021
01:21:00	27	975.062	692.581	1051.27	928.825	983.241	908.335	656.635	964.662	964.029	906.668	875.53	685.027	922.025	934.582	944.342
01:22:00	27	995.731	699.949	1070.97	937.678	987.567	908.566	662.466	982.694	981.701	918.257	889.003	691.622	920.745	948.337	945.557
01:23:00	27	984.371	695.208	1066.91	939.352	989.43	923.458	665.612	989.066	978.284	920.317	893.951	691.536	924.988	947.138	949.587
01:24:00	27	983.766	691.356	1067.75	940.75	989.376	921.179	664.976	977.981	976.597	919.88	886.031	695.897	925.484	940.407	949.471
01:25:00	27	1006.66	693.988	1077.31	945.593	990.961	914.686	663.349	986.844	987.617	920.328	895.221	700.144	936.748	954.323	955.402
01:26:00	27	989.408	691.004	1070.99	945.119	989.688	922.319	662.591	987.84	985.432	920.374	891.683	692.142	927.127	946.088	954.991
01:27:00	27	983.102	698.731	1068.87	934.101	989.25	919.211	665.821	975.512	969.683	921.634	890.393	691.278	928.419	946.463	946.539
01:28:00	27	995.416	692.875	1065.92	938.745	984.184	904.064	664.69	977.378	980.242	909.788	889.54	690.354	925.382	941.45	945.191
01:29:00	27	994.177	694.565	1073.82	947.927	992.206	913.715	658.566	987.952	976.752	913.685	895.021	694.652	927.192	949.219	951.538
01:30:00	27	987.129	693.68	1065.58	932.691	992.459	919.107	656.79	973.872	979.413	906.432	887.659	690.6	923.24	943.82	950.165
~End
Original Filename: 20220406_fusion_assay_HOPS_WT_vs_mutants; Date Last Saved: 06.04.2022 16:35:35

## Sheet: Tabelle1
	1	2	3	1	2	3	1	2	3	1	2	3	1	2	3			1	2	3			1	2	3			1	2	3			1	2	3			1	2	3
time	no HOPS	no HOPS	no HOPS	WT	WT	WT	41 deltaN	41 deltaN	41 deltaN	11 deltaN	11 deltaN	11 deltaN	18 deltaN	18 deltaN	18 deltaN		time	no HOPS	no HOPS	no HOPS	no HOPS (mean)	no HOPS (std dev)	WT	WT	WT	wt (mean)	wt (std dev)	41 deltaN	41 deltaN	41 deltaN	Vps41∆N (mean)	Vps41∆N (std dev)	11 deltaN	11 deltaN	11 deltaN	Vps11∆N (mean)	Vps11∆N (std dev)	18 deltaN	18 deltaN	18 deltaN	Vps18∆N (mean)	Vps18∆N (std dev)				time	no HOPS (mean)	wt (mean)	Vps41∆N (mean)
0	57.161	54.794	54.773	55.385	54.715	53.422	63.204	57.955	51.774	61.433	64.878	56.54	61.155	59.239	52.418		0	1.02837	0.975746	1.02137	1.0085	0.0233333	0.896952	0.924818	0.898695	0.906822	0.0127452	1.04247	1.0535	0.930116	1.0087	0.0557455	1.00044	1.01105	0.993272	1.00159	0.00730275	0.975639	0.993976	0.995404	0.98834	0.00899985					1.0085	0.906822	1.0087
1	58.414	55.513	53.931	56.782	57.778	54.624	63.698	55.99	54.422	63.959	70.072	56.936	62.6	60.572	55.753		1	1.05091	0.98855	1.00567	1.01504	0.026309	0.919576	0.97659	0.918915	0.938361	0.0270337	1.05062	1.01778	0.977688	1.01536	0.0298233	1.04158	1.09199	1.00023	1.0446	0.037523	0.998692	1.01634	1.05874	1.02459	0.0251968					1.01504	0.938361	1.01536
2	57.278	55.542	58.191	57.102	56.539	56.465	63.976	59.506	51.916	64.715	65.094	55.128	62.125	61.841	54.889		2	1.03048	0.989066	1.08511	1.03488	0.0393319	0.924759	0.955648	0.949886	0.943431	0.0134111	1.0552	1.08169	0.932667	1.02319	0.0649145	1.05389	1.01442	0.968466	1.01226	0.0349064	0.991114	1.03764	1.04233	1.02369	0.0231161					1.03488	0.943431	1.02319
3	56.647	57.103	56.888	56.747	57.514	54.534	64.181	60.212	54.571	63.927	67.119	61.408	61.979	60.968	57.256		3	1.01912	1.01686	1.06081	1.03227	0.0202042	0.91901	0.972128	0.917401	0.93618	0.0254278	1.05859	1.09452	0.980364	1.04449	0.0476595	1.04105	1.04597	1.07879	1.05527	0.0167506	0.988785	1.02299	1.08728	1.03302	0.0408298					1.03227	0.93618	1.04449
4	56.978	57.754	56.057	57.543	58.014	58.059	62.876	58.263	57.05	62.518	67.549	60.315	61.712	61.945	55.096		4	1.02508	1.02846	1.04531	1.03295	0.00885035	0.931901	0.980579	0.976701	0.96306	0.0220899	1.03706	1.0591	1.0249	1.04035	0.0141534	1.01811	1.05267	1.05959	1.04346	0.0181449	0.984525	1.03938	1.04626	1.02339	0.0276235					1.03295	0.96306	1.04035
5	55.89	56.274	56.844	58.651	58.531	57.734	65.81	57.467	56.614	64.411	69.272	55.813	62.28	62.549	55.409		5	1.00551	1.0021	1.05999	1.02253	0.0265224	0.949845	0.989318	0.971233	0.970132	0.0161336	1.08545	1.04463	1.01707	1.04905	0.0280937	1.04894	1.07952	0.9805	1.03632	0.0413992	0.993587	1.04952	1.0522	1.03177	0.0270207					1.02253	0.970132	1.04905
6	58.007	57.415	54.118	57.205	56.751	58.318	66.314	62.223	52.782	63.766	65.579	58.289	61.194	61.05	54.238		6	1.04359	1.02242	1.00916	1.02506	0.0141814	0.926427	0.959231	0.981058	0.955572	0.0224526	1.09377	1.13108	0.948225	1.05769	0.0788887	1.03843	1.02197	1.024	1.02813	0.00732873	0.976261	1.02436	1.02997	1.0102	0.0241049					1.02506	0.955572	1.05769
7	-0.121	1.286	0.786	-0.258	-0.735	0.634	2.171	1.508	-1.582	3.207	-0.95	-2.002	-0.266	-0.294	-1.335		7	-0.00217689	0.0229005	0.0146568	0.0117935	0.0104361	-0.00417827	-0.0124233	0.0106655	-0.00197869	0.00955342	0.0358079	0.0274122	-0.0284205	0.0115999	0.0285055	0.0522262	-0.0148047	-0.0351703	0.000750398	0.0373364	-0.00424364	-0.00493305	-0.0253513	-0.0115093	0.0097918					0.0117935	-0.00197869	0.0115999
8	-0.141	0.974	-1.219	-0.027	1.381	-1.014	0.097	0.186	0.893	4.25	-0.818	0.524	1.949	1.646	2.523		8	-0.0025367	0.0173445	-0.0227311	-0.00264108	0.016361	-0.000437261	0.0233423	-0.0170581	0.00194899	0.0165795	0.00159989	0.00338108	0.0160427	0.00700789	0.00642982	0.0692115	-0.0127476	0.00920542	0.0218898	0.0346409	0.0310935	0.0276184	0.0479111	0.035541	0.00886131					-0.00264108	0.00194899	0.00700789
9	0.139	1.078	-1.9	0.79	-0.429	2.705	2.85	-1.432	2.669	4.695	1.792	-2.795	-0.254	0.924	-1.682		9	0.00250072	0.0191965	-0.0354299	-0.00457756	0.0228559	0.0127939	-0.00725115	0.045505	0.0170159	0.0217435	0.0470072	-0.0260307	0.0479484	0.022975	0.0346544	0.0764583	0.0279263	-0.0491014	0.0184277	0.0516977	-0.0040522	0.0155039	-0.0319408	-0.00682969	0.0194685					-0.00457756	0.0170159	0.022975
10	0.078	-0.1	1.331	-0.972	1.235	0.453	1.92	2.252	-2.999	2.487	-0.293	3.561	0.036	-1.229	0.972		10	0.00140328	-0.00178075	0.0248196	0.00814737	0.0118605	-0.0157414	0.0208745	0.00762062	0.00425125	0.0151371	0.031668	0.0409365	-0.0538768	0.00624257	0.0426789	0.0405009	-0.00456607	0.0625582	0.032831	0.0279349	0.000574328	-0.0206215	0.018458	-0.000529712	0.0159732					0.00814737	0.00425125	0.00624257
11	54.554	57.048	54.199	54.82	57.741	52.186	58.752	54.379	53.305	59.61	63.127	57.165	58.457	59.261	53.76		11	0.981469	1.01588	1.01067	1.00267	0.015144	0.887802	0.975965	0.877902	0.91389	0.0440795	0.969041	0.988493	0.957621	0.971718	0.0127451	0.970752	0.983762	1.00425	0.986255	0.0137892	0.932596	0.994345	1.02089	0.98261	0.0369881					1.00267	0.91389	0.971718
12	54.453	56.83	56.823	56.074	55.696	54.761	61.14	54.576	51.954	57.429	66.236	52.491	58.485	57.746	50.822		12	0.979652	1.012	1.0596	1.01708	0.0328344	0.90811	0.941399	0.92122	0.923577	0.0136919	1.00843	0.992074	0.93335	0.977951	0.0322365	0.935234	1.03221	0.92214	0.963196	0.0490938	0.933043	0.968925	0.965097	0.955688	0.0160888					1.01708	0.923577	0.977951
13	55.674	55.174	55.542	56.211	53.904	53.094	59.867	51.282	53.717	59.535	66.383	53.233	57.463	58.563	51.434		13	1.00162	0.982513	1.03571	1.00661	0.0220027	0.910329	0.91111	0.893177	0.904872	0.00827588	0.987432	0.932197	0.965022	0.96155	0.0226829	0.969531	1.0345	0.935176	0.979736	0.0411872	0.916738	0.982634	0.976719	0.958697	0.0297672					1.00661	0.904872	0.96155
14	54.594	57.212	59.288	59.645	55.18	55.679	59.009	59.755	49.742	60.882	66.317	58.372	61.141	57.553	53.801		14	0.982189	1.0188	1.10556	1.03552	0.051735	0.965942	0.932678	0.936663	0.945094	0.0148312	0.97328	1.08622	0.893612	0.98437	0.0790211	0.991467	1.03347	1.02546	1.0168	0.0182092	0.975416	0.965687	1.02167	0.98759	0.0244215					1.03552	0.945094	0.98437
15	55.584	56.156	53.627	61.748	59.163	59.444	60.629	55.012	55.664	61.406	64.169	56.923	62.682	59.598	52.66		15	1	1	1	1	0	1	1	1	1	0	1	1	1	1	0	1	1	1	1	0	1	1	1	1	0				0	1	1	1
16	53.729	54.701	55.654	62.516	59.306	58.455	56.357	58.599	49.38	61.869	63.719	59.045	59.449	56.784	53.321		16	0.966627	0.97409	1.0378	0.992838	0.031937	1.01244	1.00242	0.983362	0.999406	0.0120594	0.929539	1.0652	0.887108	0.960617	0.0759557	1.00754	0.992987	1.03728	1.0126	0.0184327	0.948422	0.952784	1.01255	0.971253	0.0292574				1	0.992838	0.999406	0.960617
17	54.172	54.036	57.263	61.073	60.941	61.673	57.524	57.661	48.953	59.332	64.418	60.177	58.998	56.189	50.842		17	0.974597	0.962248	1.0678	1.00155	0.0471183	0.989068	1.03005	1.0375	1.01887	0.0212929	0.948787	1.04815	0.879437	0.958792	0.0692403	0.966225	1.00388	1.05716	1.00909	0.0373085	0.941227	0.9428	0.965477	0.949835	0.0110792				2	1.00155	1.01887	0.958792
18	53.646	53.721	53.269	62.786	61.95	65.364	58.955	52.382	50.362	62.662	63.427	54.437	60.909	59.272	50.913		18	0.965134	0.956639	0.993324	0.971699	0.0156798	1.01681	1.04711	1.09959	1.0545	0.0341967	0.972389	0.952192	0.90475	0.943111	0.0283506	1.02045	0.988437	0.956327	0.988406	0.0261798	0.971714	0.99453	0.966825	0.97769	0.012074				3	0.971699	1.0545	0.943111
19	53.009	55.283	52.883	65.41	61.095	65.713	58.043	53.555	53.841	63.579	64.737	58.059	57.541	58.331	50.772		19	0.953674	0.984454	0.986126	0.974751	0.0149198	1.05931	1.03266	1.10546	1.06581	0.030076	0.957347	0.973515	0.96725	0.966037	0.00665591	1.03539	1.00885	1.01996	1.0214	0.0108811	0.917983	0.978741	0.964147	0.953624	0.0258965				4	0.974751	1.06581	0.966037
20	54.074	53.883	55.039	66.091	62.19	72.205	56.365	56.447	50.407	57.955	64.584	54.756	57.333	56.99	46.703		20	0.972834	0.959523	1.02633	0.986229	0.0288716	1.07033	1.05116	1.21467	1.11206	0.0729812	0.929671	1.02609	0.905558	0.953771	0.0520725	0.9438	1.00647	0.961931	0.970733	0.0263299	0.914664	0.95624	0.886878	0.919261	0.0285029				5	0.986229	1.11206	0.953771
21	53.699	54.675	52.817	66.018	66.121	73.546	57.039	57.696	47.42	59.251	63.472	54.585	57.509	54.727	49.819		21	0.966087	0.973627	0.984896	0.97487	0.0077286	1.06915	1.11761	1.23723	1.14133	0.0706389	0.940787	1.04879	0.851897	0.947158	0.0805071	0.964906	0.989138	0.958927	0.97099	0.0130625	0.917472	0.918269	0.94605	0.927264	0.0132879				6	0.97487	1.14133	0.947158
22	54.917	53.731	54.024	67.971	66.929	73.951	57.571	58.07	50.163	58.6	62.029	53.032	58.186	55.355	49.211		22	0.988	0.956817	1.0074	0.984073	0.0208376	1.10078	1.13126	1.24404	1.1587	0.0616201	0.949562	1.05559	0.901175	0.968775	0.0644861	0.954304	0.966651	0.931645	0.950866	0.0144964	0.928273	0.928806	0.934504	0.930528	0.00282024				7	0.984073	1.1587	0.968775
23	51.885	52.614	50.628	68.736	64.292	74.974	59.06	50.956	46.39	60.307	63.14	55.035	58.675	59.447	52.309		23	0.933452	0.936926	0.944077	0.938151	0.00442323	1.11317	1.08669	1.26125	1.15371	0.0768128	0.974121	0.926271	0.833393	0.911262	0.058424	0.982103	0.983964	0.966832	0.977633	0.00767498	0.936074	0.997466	0.993335	0.975625	0.0280175				8	0.938151	1.15371	0.911262
24	53.465	53.328	52.071	69.75	69.131	81.021	58.45	57.975	47.854	56.88	63.2	52.688	57.017	55.983	49.407		24	0.961878	0.94964	0.970985	0.960834	0.00874502	1.12959	1.16848	1.36298	1.22035	0.102096	0.96406	1.05386	0.859694	0.959205	0.0793427	0.926294	0.984899	0.925601	0.945598	0.0277915	0.909623	0.939344	0.938226	0.929064	0.0137546				9	0.960834	1.22035	0.959205
25	52.814	53.78	51.629	70.781	65.681	79.64	58.04	53.353	51.377	58.4	64.587	50.192	57.555	56.879	47.566		25	0.950166	0.957689	0.962743	0.956866	0.0051675	1.14629	1.11017	1.33975	1.19874	0.100795	0.957298	0.969843	0.922984	0.950042	0.0198061	0.951047	1.00651	0.881753	0.946438	0.0510378	0.918206	0.954378	0.903266	0.925283	0.0214579				10	0.956866	1.19874	0.950042
26	53.186	54.129	54.958	72.967	72.018	78.336	54.777	56.808	49.149	58.706	60.768	55.277	58.005	57.89	49.892		26	0.956858	0.963904	1.02482	0.981861	0.0305125	1.18169	1.21728	1.31781	1.23893	0.0576409	0.903479	1.03265	0.882958	0.939695	0.0662591	0.95603	0.946999	0.971084	0.958038	0.00993436	0.925385	0.971341	0.947436	0.948054	0.0187666				11	0.981861	1.23893	0.939695
27	52.116	52.14	52.142	75.006	69.833	79.328	57.908	51.756	52.912	60.236	61.729	58.521	57.91	59.224	49.818		27	0.937608	0.928485	0.972309	0.946134	0.0188794	1.21471	1.18035	1.3345	1.24319	0.0660743	0.95512	0.940813	0.950561	0.948831	0.00596765	0.980946	0.961975	1.02807	0.990332	0.0277883	0.92387	0.993725	0.946031	0.954542	0.0291462				12	0.946134	1.24319	0.948831
28	51.89	51.88	53.724	77.027	72.876	80.112	55.278	52.311	48.969	58.632	60.722	59.989	61.037	59.172	53.762		28	0.933542	0.923855	1.00181	0.953069	0.0346907	1.24744	1.23178	1.34769	1.27564	0.0513471	0.911742	0.950902	0.879725	0.914123	0.0291066	0.954825	0.946282	1.05386	0.98499	0.0488248	0.973756	0.992852	1.02093	0.995845	0.0193731				13	0.953069	1.27564	0.914123
29	51.832	50.596	52.725	78.48	74.258	79.227	54.544	55.188	47.748	59.737	59.223	56.411	83.74	57.548	49.38		29	0.932499	0.90099	0.98318	0.93889	0.0338569	1.27097	1.25514	1.3328	1.28631	0.0335064	0.899635	1.0032	0.85779	0.920208	0.0611197	0.97282	0.922922	0.991005	0.962249	0.0287824	1.33595	0.965603	0.937714	1.07976	0.181514				14	0.93889	1.28631	0.920208
30	50.816	53.772	51.2	79.645	78.157	80.123	54.761	56.599	48.004	56.643	59.666	57.857	58.389	54.301	50.504		30	0.91422	0.957547	0.954743	0.94217	0.0197967	1.28984	1.32105	1.34787	1.31959	0.0237149	0.903215	1.02885	0.862389	0.931484	0.0708358	0.922434	0.929826	1.01641	0.956223	0.0426643	0.931511	0.911121	0.959058	0.933897	0.0196427				15	0.94217	1.31959	0.931484
31	51.817	52.89	52.539	79.711	74.874	83.965	59.946	53.637	51.355	57.362	65.231	51.905	54.742	57.105	47.731		31	0.932229	0.941841	0.979712	0.95126	0.0204973	1.29091	1.26555	1.41251	1.32299	0.0641383	0.988735	0.975005	0.922589	0.96211	0.0285019	0.934143	1.01655	0.911846	0.95418	0.0450321	0.873329	0.95817	0.9064	0.912633	0.0349154				16	0.95126	1.32299	0.96211
32	52.457	53.142	51.032	79.506	77.33	88.38	60.701	50.862	49.255	60.233	62.593	52.621	56.282	56.373	49.966		32	0.943743	0.946328	0.95161	0.947227	0.00327415	1.28759	1.30707	1.48678	1.36048	0.0896609	1.00119	0.924562	0.884863	0.936871	0.0482804	0.980898	0.97544	0.924424	0.960254	0.0254332	0.897897	0.945887	0.948842	0.930875	0.0233502				17	0.947227	1.36048	0.936871
33	51.165	54.246	49.252	82.771	78.212	90.542	58.354	51.792	52.701	60.112	62.909	52.216	56.779	58.041	48.872		33	0.920499	0.965988	0.918418	0.934968	0.0219506	1.34046	1.32197	1.52315	1.3952	0.0907901	0.962477	0.941467	0.94677	0.950238	0.00892073	0.978927	0.980364	0.917309	0.958867	0.0293915	0.905826	0.973875	0.928067	0.935923	0.0283307				18	0.934968	1.3952	0.950238
34	51.727	51.892	50.488	85.24	79.686	89.723	57.458	53.69	54.895	58.37	64.777	52.524	58.589	58.056	51.416		34	0.93061	0.924069	0.941466	0.932048	0.00717493	1.38045	1.34689	1.50937	1.41224	0.0700372	0.947698	0.975969	0.986185	0.969951	0.0162782	0.950559	1.00947	0.92272	0.960918	0.0361671	0.934702	0.974127	0.976377	0.961735	0.0191373				19	0.932048	1.41224	0.969951
35	53.082	53.201	50.637	88.902	82.888	92.956	59.918	52.759	52.288	60.12	65.806	51.82	56.993	57.106	51.482		35	0.954987	0.947379	0.944245	0.94887	0.00451063	1.43976	1.40101	1.56376	1.46817	0.0694136	0.988273	0.959045	0.93935	0.962223	0.0200985	0.979057	1.02551	0.910353	0.97164	0.0473048	0.90924	0.958187	0.97763	0.948352	0.028773				20	0.94887	1.46817	0.962223
36	52.547	53.101	49.755	86.388	83.947	92.384	56.126	51.273	53.721	58.747	60.95	56.313	58.156	56.943	51.151		36	0.945362	0.945598	0.927798	0.939586	0.00833613	1.39904	1.41891	1.55413	1.45736	0.0689078	0.925729	0.932033	0.965094	0.940952	0.0172641	0.956698	0.949836	0.989284	0.965272	0.0172081	0.927794	0.955452	0.971344	0.95153	0.0179942				21	0.939586	1.45736	0.940952
37	52.125	53.408	53.171	88.553	85.695	86.277	54.633	52.066	46.899	59.901	59.969	59.833	58.893	55.23	50.973		37	0.93777	0.951065	0.991497	0.960111	0.0228475	1.4341	1.44846	1.4514	1.44465	0.007556	0.901103	0.946448	0.842537	0.896696	0.0425357	0.975491	0.934548	1.05112	0.987054	0.0482883	0.939552	0.926709	0.967964	0.944742	0.0172376				22	0.960111	1.44465	0.896696
38	51.655	51.319	50.561	88.752	83.87	90.299	58.361	52.342	52.986	59.354	63.226	51.395	57.107	58.471	49.807		38	0.929314	0.913865	0.942827	0.928669	0.0118326	1.43733	1.41761	1.51906	1.458	0.043921	0.962592	0.951465	0.95189	0.955316	0.00514813	0.966583	0.985304	0.902886	0.951591	0.0352775	0.911059	0.98109	0.945822	0.94599	0.0285903				23	0.928669	1.458	0.955316
39	51.16	54.531	51.222	90.548	88.752	92.802	55.865	52.174	52.252	59.683	61.186	57.874	56.758	58.573	55.434		39	0.920409	0.971063	0.955153	0.948875	0.0211506	1.46641	1.50013	1.56117	1.50924	0.039216	0.921424	0.948411	0.938704	0.93618	0.0111612	0.971941	0.953513	1.01671	0.98072	0.026535	0.905491	0.982801	1.05268	0.980323	0.0601141				24	0.948875	1.50924	0.93618
40	51.226	53.37	54.443	92.615	87.679	88.74	55.761	54.232	46.83	58.652	60.826	58.025	56.305	55.921	53.516		40	0.921596	0.950388	1.01522	0.9624	0.0391527	1.49989	1.48199	1.49283	1.49157	0.00736051	0.919708	0.985821	0.841298	0.915609	0.0590726	0.955151	0.947903	1.01936	0.974138	0.0321131	0.898264	0.938303	1.01626	0.950941	0.0489915				25	0.9624	1.49157	0.915609
41	52.568	53.42	50.573	94.516	90.698	91.184	58.023	52.208	53.199	58.917	60.022	57.127	58.192	58.579	54.72		41	0.94574	0.951279	0.943051	0.94669	0.00342538	1.53067	1.53302	1.53395	1.53255	0.00137804	0.957017	0.949029	0.955716	0.953921	0.00349949	0.959467	0.935374	1.00358	0.966141	0.0282438	0.928369	0.982902	1.03912	0.983463	0.0452154				26	0.94669	1.53255	0.953921
42	51.725	53.487	49.678	95.169	89.403	95.308	55.941	53.052	53.325	59.727	61.436	55.225	57.099	58.178	54.802		42	0.930574	0.952472	0.926362	0.936469	0.0114455	1.54125	1.51113	1.60332	1.5519	0.0383843	0.922677	0.964371	0.95798	0.948343	0.018335	0.972657	0.957409	0.97017	0.966746	0.0066794	0.910931	0.976174	1.04068	0.975927	0.0529683				27	0.936469	1.5519	0.948343
43	52.588	50.733	53.723	93.699	91.379	93.767	56.866	53.606	51.561	59.484	64.208	52.122	56.274	54.703	48.721		43	0.9461	0.90343	1.00179	0.95044	0.0402726	1.51744	1.54453	1.5774	1.54646	0.024516	0.937934	0.974442	0.92629	0.946222	0.020513	0.9687	1.00061	0.915658	0.961655	0.0350365	0.89777	0.917866	0.925199	0.913612	0.0115952				28	0.95044	1.54646	0.946222
44	51.593	55.034	53.113	98.607	93.958	93.603	54.941	54.477	51.633	57.626	60.55	61.621	57.825	57.312	53.32		44	0.928199	0.98002	0.990415	0.966211	0.0272119	1.59693	1.58812	1.57464	1.58656	0.00916408	0.906184	0.990275	0.927583	0.941347	0.0356831	0.938442	0.943602	1.08253	0.988192	0.0667418	0.922514	0.961643	1.01253	0.965563	0.0368547				29	0.966211	1.58656	0.941347
45	51.938	50.287	52.567	98.366	91.655	94.389	60.172	52.316	49.268	58.949	63.759	55.887	54.993	57.372	49.546		45	0.934406	0.895488	0.980234	0.936709	0.0346358	1.59302	1.54919	1.58786	1.57669	0.0195588	0.992462	0.950993	0.885096	0.94285	0.0442085	0.959988	0.993611	0.9818	0.978466	0.0139275	0.877333	0.96265	0.940866	0.92695	0.0361937				30	0.936709	1.57669	0.94285
46	52.064	53.201	53.861	94.554	95.709	90.224	54.301	54.76	46.624	58.283	60.948	60.601	57.753	55.41	53.529		46	0.936672	0.947379	1.00436	0.962805	0.0297096	1.53129	1.61772	1.5178	1.5556	0.0442665	0.895628	0.995419	0.837597	0.909548	0.0651782	0.949142	0.949804	1.06461	0.987853	0.0542784	0.921365	0.929729	1.0165	0.955865	0.0430124				31	0.962805	1.5556	0.909548
47	52.418	54.115	53.353	97.371	93.255	99.135	56.776	51.632	51.999	58.409	62.887	55.356	57.332	60.171	55.159		47	0.943041	0.963655	0.994891	0.967196	0.021315	1.57691	1.57624	1.6677	1.60695	0.04296	0.93645	0.938559	0.934159	0.936389	0.00179694	0.951194	0.980022	0.972472	0.967896	0.0122056	0.914649	1.00961	1.04746	0.990573	0.055865				32	0.967196	1.60695	0.936389
48	53.268	53.622	51.534	100.272	97.308	93.197	55.796	54.378	52.365	60.22	60.046	61.339	57.792	56.121	54.378		48	0.958333	0.954876	0.960971	0.95806	0.00249595	1.62389	1.64474	1.56781	1.61215	0.0324864	0.920286	0.988475	0.940734	0.949832	0.0285719	0.980686	0.935748	1.07758	0.998004	0.0591829	0.921987	0.941659	1.03262	0.965424	0.048192				33	0.95806	1.61215	0.949832
49	52.143	52.23	53.503	98.786	97.839	94.444	56.305	55.693	48.434	58.343	63.935	62.43	56.199	55.958	55.168		49	0.938094	0.930088	0.997688	0.95529	0.0301576	1.59983	1.65372	1.58879	1.61411	0.0283672	0.928681	1.01238	0.870114	0.937058	0.0583809	0.950119	0.996353	1.09674	1.01441	0.0612057	0.896573	0.938924	1.04763	0.961041	0.0636194				34	0.95529	1.61411	0.937058
50	53.363	50.999	52.974	99.44	96.351	94.6	59.387	54.173	47.29	58.736	65.624	53.962	55.844	57.363	49.978		50	0.960042	0.908167	0.987823	0.952011	0.0330119	1.61042	1.62857	1.59141	1.61013	0.0151697	0.979515	0.984749	0.849562	0.937942	0.0625307	0.956519	1.02267	0.947982	0.975725	0.0333806	0.89091	0.962499	0.94907	0.934159	0.0310696				35	0.952011	1.61013	0.937942
51	52.1	52.381	55.997	98.915	99.209	95.552	55.903	54.219	47.513	58.375	64.175	58.017	57.45	56.904	50.599		51	0.93732	0.932777	1.04419	0.97143	0.0514853	1.60191	1.67688	1.60743	1.62874	0.0341118	0.922051	0.985585	0.853568	0.920401	0.0539084	0.95064	1.00009	1.01922	0.989984	0.0288954	0.916531	0.954797	0.960862	0.944063	0.0196252				36	0.97143	1.62874	0.920401
52	52.312	52.574	54.758	99.755	99.304	95.727	57.453	54.514	47.987	58.616	63.876	56.432	58.407	55.226	50.322		52	0.941134	0.936213	1.02109	0.966146	0.0389033	1.61552	1.67848	1.61037	1.63479	0.0309654	0.947616	0.990947	0.862083	0.933549	0.0535407	0.954565	0.995434	0.991374	0.980458	0.0183839	0.931799	0.926642	0.955602	0.938014	0.0126134				37	0.966146	1.63479	0.933549
53	54.077	53.096	53.763	100.107	98.915	93.182	54.732	55.506	55.637	59.816	62.774	59.166	58.235	56.196	54.021		53	0.972888	0.945509	1.00254	0.973644	0.0232874	1.62122	1.67191	1.56756	1.62023	0.0426053	0.902736	1.00898	0.999515	0.97041	0.0480085	0.974107	0.978261	1.0394	0.997257	0.0298506	0.929055	0.942918	1.02585	0.965939	0.0427363				38	0.973644	1.62023	0.97041
54	52.38	52.054	52.964	100.033	99.884	98.192	59.657	52.137	47.955	57.59	65.077	54.97	57.792	59.159	51.303		54	0.942358	0.926953	0.987637	0.952316	0.0257552	1.62002	1.68828	1.65184	1.65338	0.0278903	0.983968	0.947739	0.861508	0.931072	0.0513643	0.937856	1.01415	0.96569	0.972566	0.031524	0.921987	0.992634	0.974231	0.962951	0.0299241				39	0.952316	1.65338	0.931072
55	52.983	51.785	53.716	101.66	100.315	96.099	54.745	56.124	49.529	61.091	61.985	62.767	59.164	55.549	56.965		55	0.953206	0.922163	1.00166	0.95901	0.0327127	1.64637	1.69557	1.61663	1.65286	0.0325516	0.902951	1.02021	0.889785	0.93765	0.0586284	0.99487	0.965965	1.10267	1.02117	0.0588238	0.943875	0.932061	1.08175	0.985896	0.0679511				40	0.95901	1.65286	0.93765
56	52.78	52.892	55.414	100.118	101.527	94.248	55.678	56.385	48.087	58.373	61.883	59.09	58.012	55.638	52.555		56	0.949554	0.941876	1.03332	0.974918	0.0414175	1.6214	1.71606	1.58549	1.64098	0.0550719	0.918339	1.02496	0.86388	0.935726	0.0668993	0.950607	0.964375	1.03807	0.984351	0.0383982	0.925497	0.933555	0.998006	0.952353	0.032449				41	0.974918	1.64098	0.935726
57	51.751	52.966	47.446	99.767	95.965	97.92	58.078	49.814	53.212	59.542	66.63	54.061	57.937	60.468	52.574		57	0.931041	0.943194	0.884741	0.919659	0.0251842	1.61571	1.62204	1.64726	1.62834	0.0136289	0.957924	0.905512	0.95595	0.939795	0.0242557	0.969645	1.03835	0.949722	0.985906	0.0379663	0.9243	1.0146	0.998367	0.979088	0.0393035				42	0.919659	1.62834	0.939795
58	52.687	53.212	52.132	102.7	101.842	96.135	54.204	54.24	50.078	61.061	60.902	61.601	59.86	58.101	55.573		58	0.947881	0.947575	0.972122	0.955859	0.0115004	1.66321	1.72138	1.61724	1.66728	0.0426134	0.894028	0.985967	0.899648	0.926547	0.0420784	0.994382	0.949088	1.08218	1.00855	0.0552512	0.954979	0.974882	1.05532	0.995059	0.0433765				43	0.955859	1.66728	0.926547
59	51.719	51.802	48.086	102.656	98.545	99.282	59.245	51.145	55.064	61.198	67.475	56.884	57.902	59.756	53.351		59	0.930466	0.922466	0.896675	0.916536	0.0144182	1.6625	1.66565	1.67018	1.66611	0.00315106	0.977173	0.929706	0.989221	0.965367	0.025691	0.996613	1.05152	0.999315	1.01582	0.0252708	0.923742	1.00265	1.01312	0.979838	0.0398957				44	0.916536	1.66611	0.965367
60	53.268	51.802	53.742	104.289	102.619	95.859	55.156	55.761	49.088	62.266	63	62.649	57.061	56.317	55.817		60	0.958333	0.922466	1.00214	0.960981	0.0325824	1.68895	1.73451	1.61259	1.67868	0.0502996	0.90973	1.01362	0.881863	0.935069	0.0566936	1.01401	0.981782	1.10059	1.03213	0.0501678	0.910325	0.944948	1.05995	0.971741	0.063955				45	0.960981	1.67868	0.935069
61	52.841	54.38	55.105	103.309	102.914	97.524	56.241	55.452	48.573	61.335	66.115	57.101	57.578	56.339	51.662		61	0.950651	0.968374	1.02756	0.982195	0.0328841	1.67307	1.7395	1.6406	1.68439	0.0411598	0.927625	1.008	0.872611	0.936078	0.055594	0.998844	1.03033	1.00313	1.01077	0.0139415	0.918573	0.945317	0.981048	0.948313	0.0255932				46	0.982195	1.68439	0.936078
62	52.595	51.543	51.36	101.382	100.669	93.776	55.142	54.239	50.446	62.234	62.584	62.529	57.704	56.861	54.448		62	0.946226	0.917854	0.957727	0.940602	0.0167566	1.64187	1.70155	1.57755	1.64032	0.0506351	0.909499	0.985949	0.906259	0.933902	0.0368261	1.01348	0.9753	1.09848	1.02909	0.0514861	0.920583	0.954076	1.03395	0.969538	0.0475571				47	0.940602	1.64032	0.933902
63	52.775	52.206	54.643	104.13	104.853	97.295	53.554	55.978	47.681	62.498	63.252	58.403	58.804	55.424	57.148		63	0.949464	0.92966	1.01895	0.966023	0.0382852	1.68637	1.77227	1.63675	1.69846	0.0559839	0.883307	1.01756	0.856586	0.919151	0.0704355	1.01778	0.98571	1.026	1.00983	0.0173831	0.938132	0.929964	1.08523	0.984441	0.0713439				48	0.966023	1.69846	0.919151
64	53.032	50.945	52.599	103.572	100.949	100.714	58.517	50.687	50.482	60.862	66.041	58.475	58.423	60.835	55.377		64	0.954088	0.907205	0.980831	0.947374	0.0304301	1.67733	1.70629	1.69427	1.69263	0.0118764	0.965165	0.921381	0.906906	0.931151	0.0247673	0.991141	1.02917	1.02726	1.01586	0.0174961	0.932054	1.02076	1.0516	1.00147	0.0506724				49	0.947374	1.69263	0.931151
65	53.379	53.667	54.941	103.171	103.712	100.678	60.203	57.397	48.52	60.127	65.387	56.21	56.963	56.902	50.742		65	0.96033	0.955677	1.0245	0.98017	0.0314054	1.67084	1.75299	1.69366	1.70583	0.0346229	0.992974	1.04335	0.871659	0.969329	0.0720609	0.979171	1.01898	0.987474	0.995209	0.0171478	0.908762	0.954764	0.963578	0.942368	0.0240339				50	0.98017	1.70583	0.969329
66	53.044	53.679	55.495	102.455	103.081	96.796	58.26	53.636	50.14	58.741	65.672	56.966	61.087	56.212	54.127		66	0.954303	0.955891	1.03483	0.981676	0.0375936	1.65924	1.74232	1.62836	1.67664	0.0481251	0.960926	0.974987	0.900762	0.945558	0.032192	0.9566	1.02342	1.00076	0.993593	0.0277462	0.974554	0.943186	1.02786	0.981866	0.0349517				51	0.981676	1.67664	0.945558
67	52.867	51.608	50.707	102.814	100.987	101.455	58.599	50.137	55.119	60.466	66.54	54.392	59.126	59.303	53.073		67	0.951119	0.919011	0.94555	0.93856	0.0140088	1.66506	1.70693	1.70673	1.69291	0.0196918	0.966518	0.911383	0.990209	0.956037	0.033023	0.984692	1.03695	0.955536	0.992393	0.0336797	0.943269	0.99505	1.00784	0.982054	0.0279179				52	0.93856	1.69291	0.956037
68	52.773	53.348	54.223	102.426	102.849	99.454	59.288	52.528	51.048	58.028	65.06	59.097	56.58	59.411	50.595		68	0.949428	0.949996	1.01111	0.970179	0.0289459	1.65877	1.7384	1.67307	1.69008	0.0346615	0.977882	0.954846	0.917074	0.949934	0.0250666	0.944989	1.01389	1.03819	0.999022	0.0394747	0.902651	0.996862	0.960786	0.953433	0.0388112				53	0.970179	1.69008	0.949934
69	52.87	52.822	55.44	103.716	103.711	98.281	58.54	56.895	48.795	59.936	64.668	55.961	58.466	54.351	52.354		69	0.951173	0.94063	1.03381	0.975203	0.0416624	1.67967	1.75297	1.65334	1.69532	0.0421552	0.965545	1.03423	0.876599	0.958791	0.0645291	0.976061	1.00778	0.9831	0.988979	0.0135988	0.93274	0.91196	0.994189	0.946296	0.0349117				54	0.975203	1.69532	0.958791
70	53.468	53.611	51.39	102.358	104.112	98.261	56.962	57.793	50.958	61.753	63.408	57.821	57.104	55.927	53.32		70	0.961931	0.95468	0.958286	0.958299	0.0029605	1.65767	1.75975	1.653	1.69014	0.0492569	0.939517	1.05055	0.915457	0.968509	0.0588393	1.00565	0.988141	1.01578	1.00319	0.0114155	0.911011	0.938404	1.01253	0.953983	0.0428852				55	0.958299	1.69014	0.968509
71	54.17	52.076	51.817	105.01	102.03	99.992	59.494	50.57	54.677	60.234	66.109	55.019	57.957	59.106	53.522		71	0.974561	0.927345	0.966248	0.956052	0.0205801	1.70062	1.72456	1.68212	1.70243	0.017372	0.98128	0.919254	0.982269	0.960934	0.029475	0.980914	1.03023	0.966551	0.992566	0.0272722	0.92462	0.991745	1.01637	0.977578	0.0387731				56	0.956052	1.70243	0.960934
72	53.796	54.888	53.475	102.907	104.762	97.94	56.48	58.119	51.208	60.189	64.601	61.682	57.181	58.13	54.404		72	0.967832	0.97742	0.997166	0.980806	0.0122122	1.66656	1.77074	1.6476	1.69497	0.0541327	0.931567	1.05648	0.919948	0.969331	0.0618047	0.980181	1.00673	1.0836	1.02351	0.0438566	0.91224	0.975368	1.03312	0.973575	0.0493647				57	0.980806	1.69497	0.969331
73	53.225	53.854	48.714	102.373	104.601	99.151	56.902	51.921	52.368	64.482	66.077	60.09	59.113	59.614	58.099		73	0.95756	0.959007	0.908386	0.941651	0.0235294	1.65792	1.76801	1.66797	1.69797	0.0497	0.938528	0.943812	0.940788	0.941043	0.0021649	1.05009	1.02973	1.05564	1.04515	0.0111363	0.943062	1.00027	1.10329	1.01554	0.0662961				58	0.941651	1.69797	0.941043
74	53.951	52.595	49.581	104.905	106.221	99.682	58.884	52.923	54.901	63.391	66.734	63.555	57.014	58.583	54.836		74	0.970621	0.936587	0.924553	0.94392	0.0195089	1.69892	1.7954	1.67691	1.72374	0.0514585	0.971218	0.962026	0.986293	0.973179	0.0100032	1.03233	1.03997	1.11651	1.06294	0.03801	0.909575	0.982969	1.04132	0.977955	0.0539019				59	0.94392	1.72374	0.973179
75	53.048	53.511	52.719	101.612	105.426	102.947	58.433	50.135	49.153	61.234	65.072	60.048	56.922	59.545	54.796		75	0.954375	0.952899	0.983068	0.963448	0.013887	1.64559	1.78196	1.73183	1.71979	0.0563184	0.96378	0.911347	0.88303	0.919386	0.0334523	0.997199	1.01407	1.0549	1.02206	0.024223	0.908108	0.999111	1.04056	0.982593	0.0553213				60	0.963448	1.71979	0.919386
76	54.131	51.38	48.126	103.171	100.841	98.013	55.544	50.335	53.477	63.595	65.329	61.741	60.253	61.592	57.236		76	0.973859	0.914951	0.897421	0.928744	0.0326944	1.67084	1.70446	1.64883	1.67471	0.0228757	0.916129	0.914982	0.960711	0.930607	0.0212914	1.03565	1.01808	1.08464	1.04612	0.0281656	0.961249	1.03346	1.0869	1.0272	0.0514861				61	0.928744	1.67471	0.930607
77	53.544	52.17	52.597	104.77	104.951	102.687	60.277	50.464	53.473	63.431	67.632	61.723	58.235	57.909	56.869		77	0.963299	0.929019	0.980793	0.957704	0.0215038	1.69674	1.77393	1.72746	1.73271	0.0317324	0.994194	0.917327	0.960639	0.957387	0.031465	1.03298	1.05397	1.08432	1.05709	0.0210784	0.929055	0.97166	1.07993	0.993548	0.0635084				62	0.957704	1.73271	0.957387
78	53.862	53.792	54.935	101.639	105.882	96.318	59.798	53.343	49.103	65.662	64.238	62.241	58.875	58.065	55.048		78	0.96902	0.957903	1.02439	0.983771	0.0290787	1.64603	1.78967	1.62031	1.68534	0.0745151	0.986294	0.969661	0.882132	0.946029	0.0456893	1.06931	1.00108	1.09342	1.0546	0.0391092	0.939265	0.974278	1.04535	0.986297	0.0441341				63	0.983771	1.68534	0.946029
79	54.215	51.703	51.165	101.79	99.987	102.194	60.888	49.724	54.243	62.061	67.724	57.095	57.382	60.755	54.077		79	0.975371	0.920703	0.95409	0.950055	0.0224996	1.64847	1.69003	1.71916	1.68589	0.0290069	1.00427	0.903876	0.974472	0.960873	0.0420995	1.01067	1.0554	1.00302	1.02303	0.0231015	0.915446	1.01941	1.02691	0.987256	0.0508693				64	0.950055	1.68589	0.960873
80	54.47	52.352	54.832	103.965	107.61	97.929	56.453	57.15	51.408	62.582	65.673	62.114	60.219	57.438	53.653		80	0.979958	0.93226	1.02247	0.978229	0.0368483	1.6837	1.81887	1.64742	1.71666	0.0737761	0.931122	1.03886	0.923541	0.964509	0.052668	1.01915	1.02344	1.09119	1.04459	0.032997	0.960706	0.963757	1.01886	0.981107	0.0267223				65	0.978229	1.71666	0.964509
81	53.709	52.622	53.597	102.039	105.699	100.311	57.266	54.002	50.579	62.84	66.979	60.621	59.283	57.163	54.418		81	0.966267	0.937068	0.999441	0.967592	0.0254807	1.65251	1.78657	1.68749	1.70886	0.0567794	0.944531	0.98164	0.908648	0.94494	0.0298003	1.02335	1.04379	1.06496	1.04404	0.016989	0.945774	0.959143	1.03338	0.979434	0.0385371				66	0.967592	1.70886	0.94494
82	54.103	53.808	54.194	104.823	109.264	97.844	55.424	55.155	49.766	64.421	66.631	62.953	61.866	57.152	57.708		82	0.973356	0.958188	1.01057	0.980706	0.0220086	1.69759	1.84683	1.64599	1.73014	0.085162	0.91415	1.0026	0.894043	0.936931	0.0471548	1.0491	1.03837	1.10593	1.06447	0.0296465	0.986982	0.958958	1.09586	1.01393	0.0590498				67	0.980706	1.73014	0.936931
83	53.294	52.951	51.652	103.806	108.283	100.46	55.57	55.052	52.877	65.114	65.727	61.229	61.859	60.4	58.041		83	0.958801	0.942927	0.963172	0.954966	0.00869828	1.68112	1.83025	1.68999	1.73379	0.0683036	0.916558	1.00073	0.949932	0.955739	0.0346064	1.06038	1.02428	1.07565	1.05344	0.0215381	0.98687	1.01346	1.10218	1.03417	0.0493024				68	0.954966	1.73379	0.955739
84	52.624	53.862	51.02	105.937	105.707	103.695	58.745	54.325	54.015	63.967	69.638	58.816	59.538	60.637	60.257		84	0.946747	0.95915	0.951386	0.952428	0.00511646	1.71563	1.78671	1.74441	1.74892	0.0291899	0.968926	0.987512	0.970376	0.975604	0.00844055	1.04171	1.08523	1.03326	1.0534	0.0227712	0.949842	1.01743	1.14427	1.03718	0.0805917				69	0.952428	1.74892	0.975604
85	53.046	53.552	54.97	105.172	110.463	100.456	55.921	57.187	54.363	64.257	65.105	56.189	61.377	58.062	52.755		85	0.954339	0.953629	1.02504	0.977671	0.0334988	1.70325	1.8671	1.68993	1.75342	0.0805629	0.922347	1.03954	0.976628	0.979504	0.0478856	1.04643	1.01459	0.987105	1.01604	0.0242404	0.979181	0.974227	1.0018	0.985071	0.0120038				70	0.977671	1.75342	0.979504
86	53.908	55.654	53.358	103.139	108.875	98.653	53.193	54.093	53.496	63.952	64.351	62.01	61.429	60.693	60.463		86	0.969847	0.991061	0.994984	0.985297	0.0110415	1.67032	1.84025	1.6596	1.72339	0.0827515	0.877352	0.983295	0.961052	0.940566	0.045612	1.04146	1.00284	1.08937	1.04455	0.0353934	0.98001	1.01837	1.14818	1.04885	0.0719574				71	0.985297	1.72339	0.940566
87	54.673	53.293	52.897	105.857	109.851	98.897	61.369	55.786	49.008	66.419	66.228	64.228	58.942	57.138	57.55		87	0.98361	0.949017	0.986387	0.973005	0.0169999	1.71434	1.85675	1.6637	1.74493	0.0817275	1.01221	1.01407	0.880425	0.9689	0.0625657	1.08164	1.03209	1.12833	1.08069	0.0392973	0.940334	0.958723	1.09286	0.997306	0.0679828				72	0.973005	1.74493	0.9689
88	53.245	53.141	50.908	103.621	111.15	97.187	55.383	55.567	49.811	62.11	65.114	61.03	60.045	56.68	55.992		88	0.95792	0.94631	0.949298	0.951176	0.00492198	1.67813	1.87871	1.63493	1.73059	0.10621	0.913474	1.01009	0.894851	0.939471	0.0505095	1.01146	1.01473	1.07215	1.03278	0.0278703	0.957931	0.951039	1.06327	0.990748	0.0513609				73	0.951176	1.73059	0.939471
89	53.532	55.015	54.142	102.773	108.041	98.219	55.215	55.972	52.184	65.26	64.977	65.674	59.726	57.687	55.689		89	0.963083	0.979682	1.0096	0.984123	0.0192498	1.66439	1.82616	1.65229	1.71428	0.0792623	0.910703	1.01745	0.937482	0.955212	0.0453471	1.06276	1.01259	1.15373	1.07636	0.0584181	0.952841	0.967935	1.05752	0.992765	0.0462011				74	0.984123	1.71428	0.955212
90	54.69	53.051	49.285	105.684	106.556	105.716	59.302	52.006	54.787	64.039	68.835	58.649	58.502	58.819	56.382		90	0.983916	0.944708	0.919033	0.949219	0.0266797	1.71154	1.80106	1.77841	1.76367	0.0380047	0.978113	0.945357	0.984245	0.969238	0.0170709	1.04288	1.07271	1.03032	1.04864	0.0177794	0.933314	0.986929	1.07068	0.996974	0.0565273				75	0.949219	1.76367	0.969238
[truncated: 7 more columns]
