# Supplementary material for: Structure of the HOPS tethering complex, a lysosomal membrane fusion machinery
Source: eLife journal article supplement (doi:10.7554/elife.80901), 2022-09-13
Supplement: supp [file elife_poa_e80901_Figure_2_figure_supplement_1.pdf › elife_poa_e80901_Figure_2_figure_supplement_1.pdf]

**a**

Vps11

Vps18

C972

C969

C944

H946

C952

C928

C931

H949

C843

C891

H845

C894

H848

C826

C851

C829

Vps18

*D. melanogaster*

*H. sapiens*

*M. musculus*

*S. cerevisiae*

*D. rerio*

Conservation

**Vps11**

*D. melanogaster* QDLCREMLSMQSIYFLCGHSFHHEECLNYKSTKRQ---EKFLCIIC 774  
*H. sapiens* CSICNSALELP SVHFLCGHSFHQHC FESYSESDA-----DCPTC 860  
*M. musculus* CSICNSALELP SVHFLCGHSFHQHC FESYSESDA-----DCPTC 860  
*S. cerevisiae* CFMCRLTLDIPVVFVKGGHIYHQHCLNEEDTLESERKLFKCPKC 972  
*D. rerio* CSMCNSPLLELP SVHFLCGHSFHQHCLESFAESEA-----ECPTC 845

Conservation

\* 39 \* 735 \* 697697 \* 6 \* 6 \* 59 \* 86 \* 874446534 - - - - - 3 \* 65 \*

## Vps18

*D. melanogaster* CEICEMMLLVKPF<sup>FI</sup>CGHK<sup>FH</sup>SDCLEKHVVPL<sup>LT</sup>KEQCRRLGT<sup>LK</sup>QQL<sup>EA</sup>EVQTAQAPQSGALSKQQAMELQR-KRAALKTEIED<sup>IL</sup>AAD<sup>CL</sup>FC 979  
*H. sapiens* CATCDFPL<sup>LN</sup>RPFF<sup>YL</sup>FLCGHMFHADCLLQAVRPLPAYKQARLEELQ<sup>RK</sup>LGAAPPPAKGSARAKEAEGGAATAGP-SREQLKADLDELVA<sup>AE</sup>CVYC 947  
*M. musculus* CSTCDFPL<sup>LN</sup>RPFF<sup>YL</sup>FLCGHMFHADCLLQAVRPLPAYKQARLEELQ<sup>RK</sup>LGAAPPTKGSVKAKEAEGAAAVGP-SREQLKADLDELVA<sup>AE</sup>CVYC 947  
*S. cerevisiae* CDECGKFLQIKKFIV<sup>FC</sup>CGHCFHWN<sup>CI</sup>IRVILNSNDYNLRK<sup>TEN</sup>FLKA-----KSKHNLNDLEN<sup>TI</sup>IVEKCGLC 894  
*D. rerio* CATCDFPL<sup>LN</sup>RPFF<sup>YL</sup>FLCGHMFHYDCLLQEV<sup>IP</sup>HL<sup>SV</sup>YKQNK<sup>L</sup>DELQK<sup>KL</sup>LAATTQT<sup>TK</sup>ARHKPREEDTVSLGKGQGSREQIK<sup>SD</sup>IDD<sup>II</sup>ACECVYC 948

Conservation  
 .44.466.7694.79.6.6.6.58.5719482643555497468574203010101000111000200210100-56336679+97+9846.77.
