# Supplementary material for: Structure of the HOPS tethering complex, a lysosomal membrane fusion machinery
Source: eLife journal article supplement (doi:10.7554/elife.80901), 2022-09-13
Supplement: supp [file Pulldown_Quantification.xlsx]

## Sheet: Tabelle1
																		WT
	Western Blot Quantification
		1.		load	Ypt7 GDP	Ypt7 GTP	Ypt1 GDP	Ypt1 GTP				Ypt7 GDP	Ypt7 GTP	Ypt1 GDP	Ypt1 GTP
			WT	17789	16766	16761	748	404			WT	0.926871	0.987577	0.0254345	0.0270413
			41 ΔN	16445	8779	8421	132	123			41 ΔN	0.45196	0.529894	0.00976437	0.0128765
			11 ΔN	23147	6387	6173	34	23			11 ΔN	0.449516	0.495329	0.0094156	0.0148776
			18 ΔN	10179	3224	16303	169	123			18 ΔN	0.589411	0.818466	0.00774639	0.00975748
		2.		load	Ypt7 GDP	Ypt7 GTP	Ypt1 GDP	Ypt1 GTP
			WT	20988	15657	19759	426	765
			41 ΔN	16873	9006	10084	237	381										18 deltaN
			11 ΔN	27432	25772	25779	416	959
			18 ΔN	26356	7563	9861	224	508
		3.		load	Ypt7 GDP	Ypt7 GTP	Ypt1 GDP	Ypt1 GTP
			WT	12256	14878	13879	124	211
			41 ΔN	27413	9663	13676	224	278
			11 ΔN	31625	4793	8766	324	241
			18 ΔN	30593	28779	28778	127	24
		mean																41 deltaN
				load	Ypt7 GDP	Ypt7 GTP	Ypt1 GDP	Ypt1 GTP
			WT	17011	15767	16799.7	432.667	460
			41 ΔN	20243.7	9149.33	10727	197.667	260.667
			11 ΔN	27401.3	12317.3	13572.7	258	407.667
			18 ΔN	22376	13188.7	18314	173.333	218.333
																		11 deltaN
