# Supplementary figures and images for: Structure of the HOPS tethering complex, a lysosomal membrane fusion machinery
Source: eLife journal article supplement (doi:10.7554/elife.80901), 2022-09-13

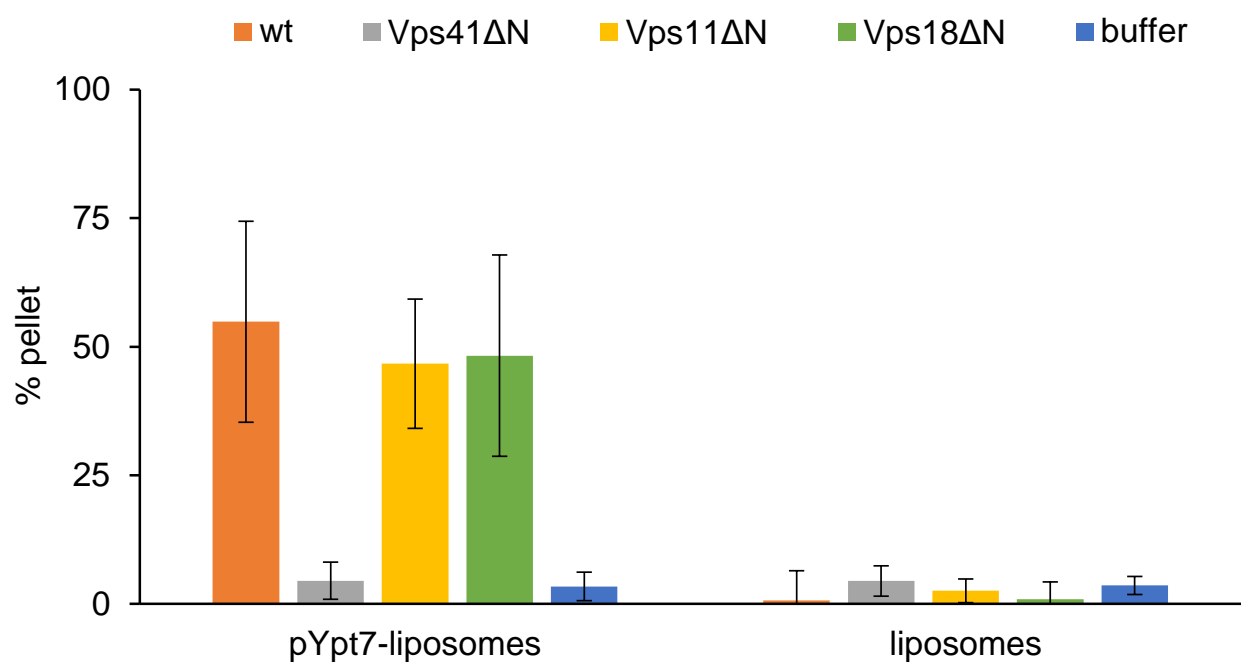

Supplement: fig3-data1 [file elife-80901-fig3-data1-v2.zip]

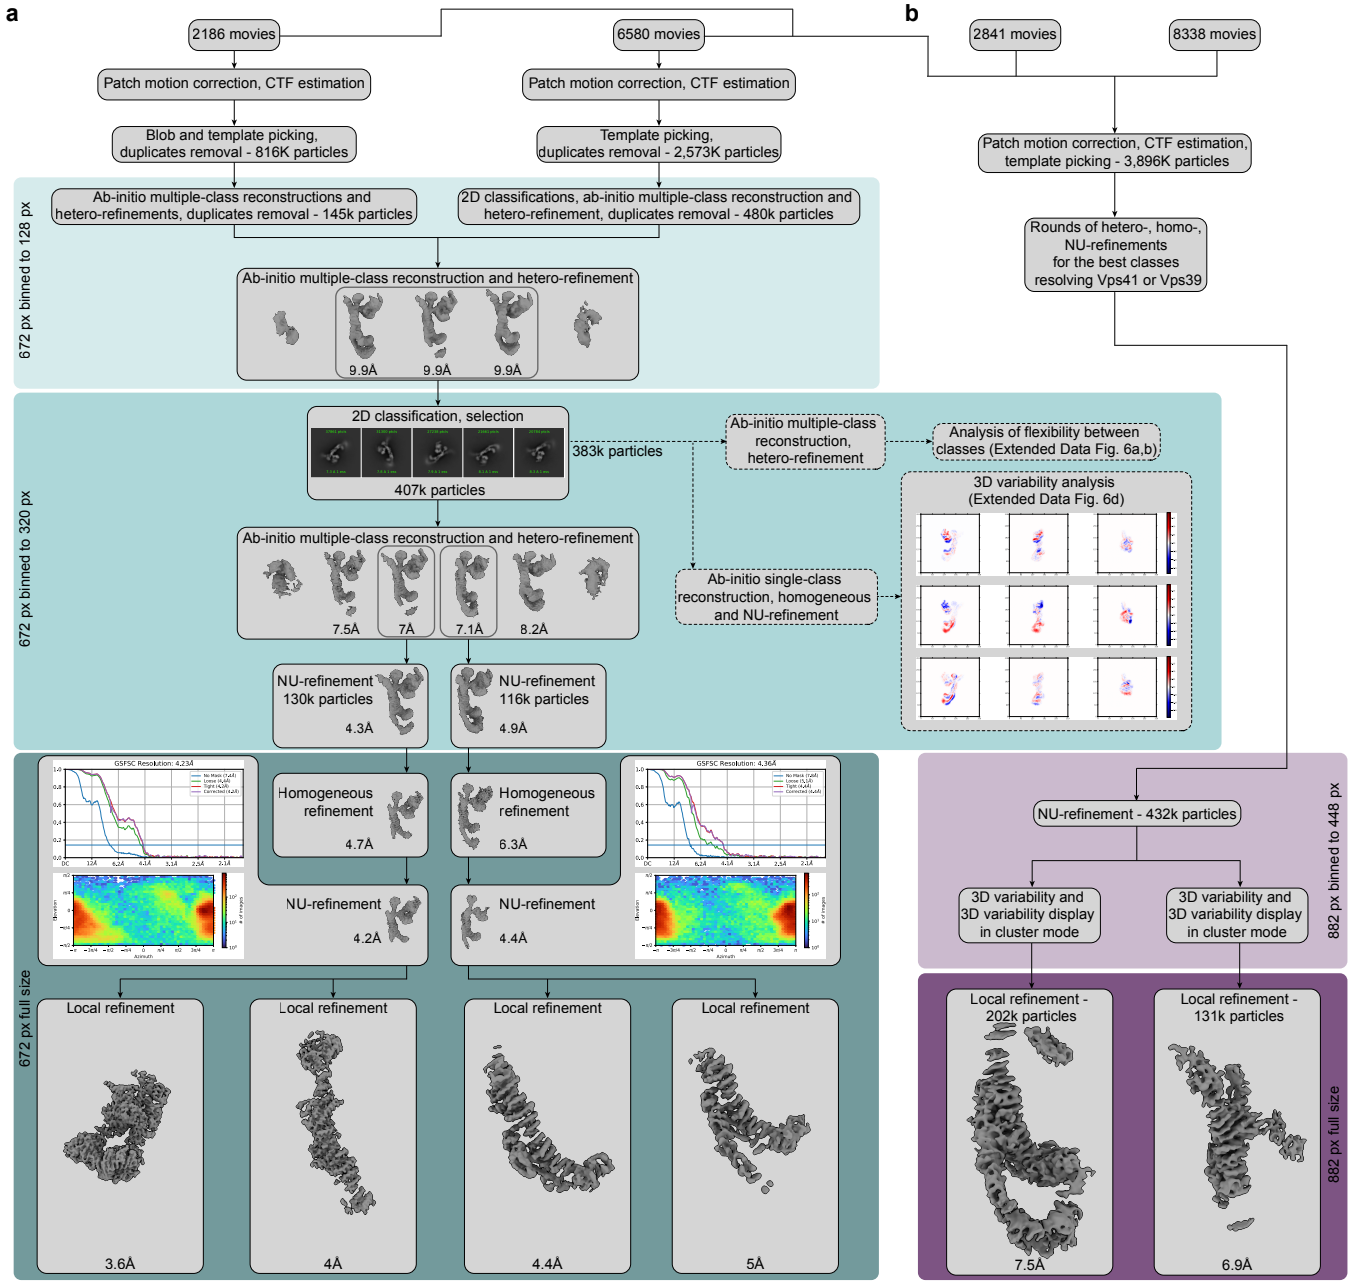

Supplement: supp [file elife_poa_e80901_Figure_1_figure_supplement_1.pdf › elife_poa_e80901_Figure_1_figure_supplement_1.pdf]

**a**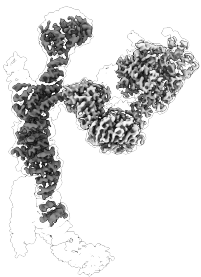**b**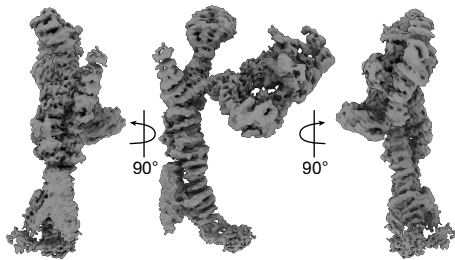**c**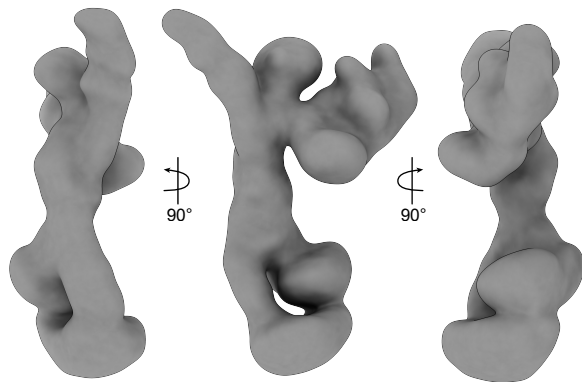**d**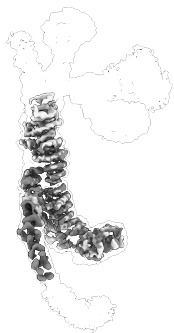**e**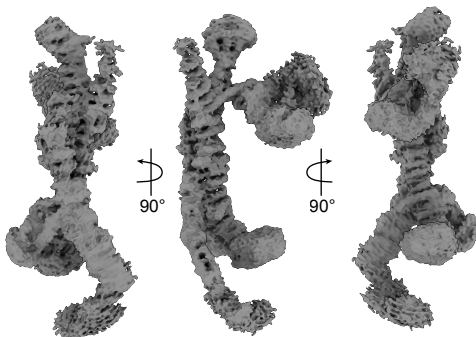**f**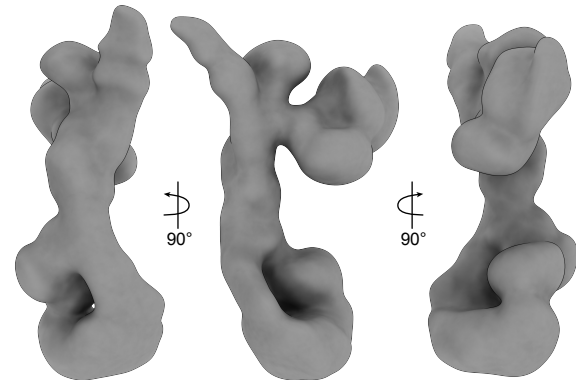

Supplement: supp [file elife_poa_e80901_Figure_1_figure_supplement_2.pdf › elife_poa_e80901_Figure_1_figure_supplement_2.pdf]

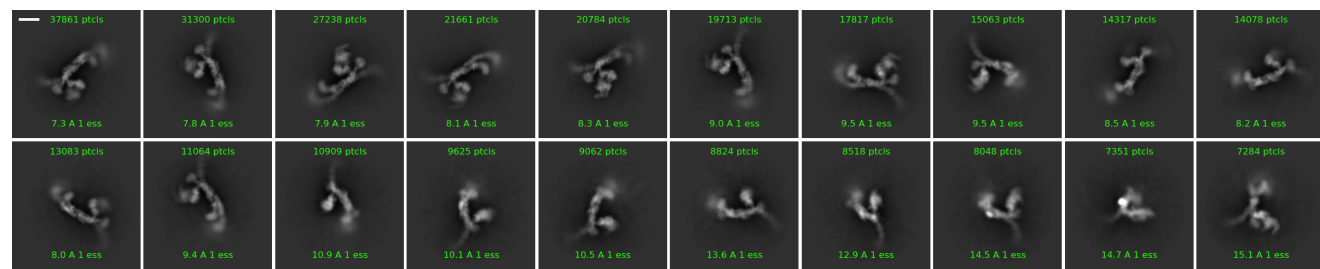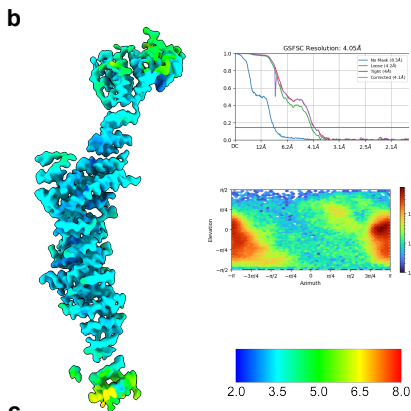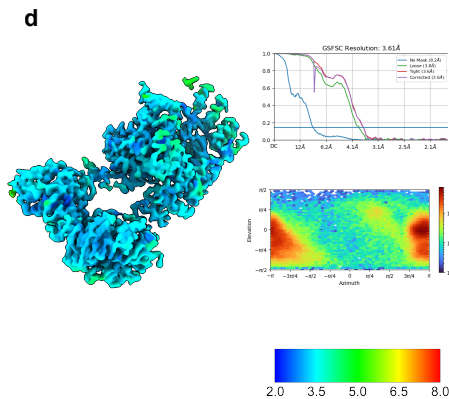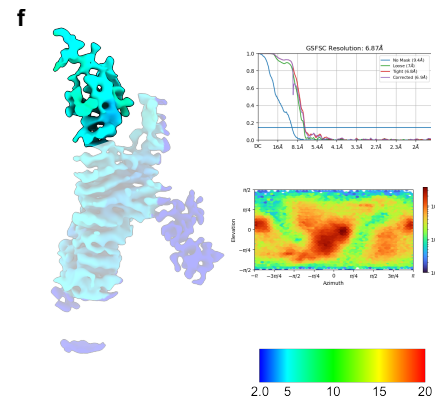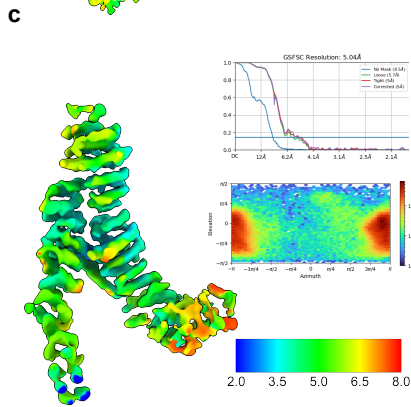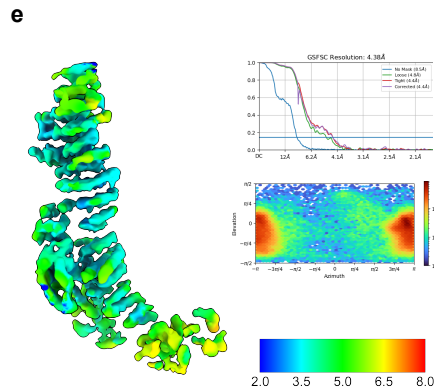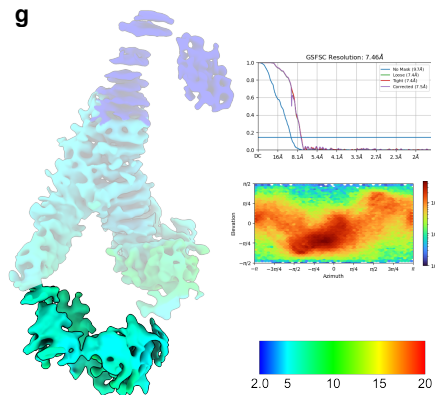

Supplement: supp [file elife_poa_e80901_Figure_1_figure_supplement_3.pdf › elife_poa_e80901_Figure_1_figure_supplement_3.pdf]

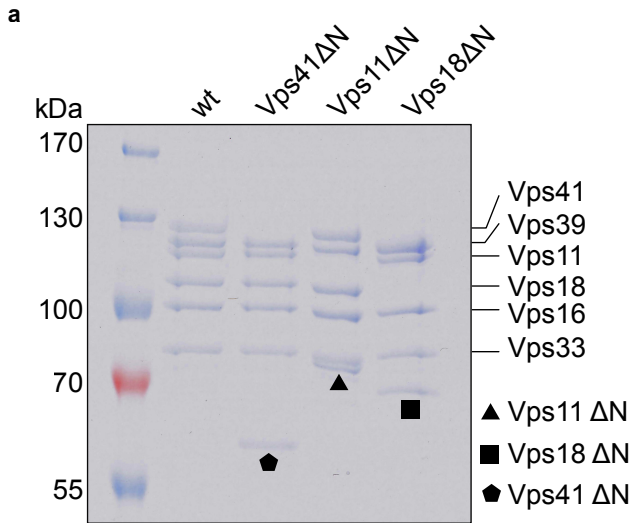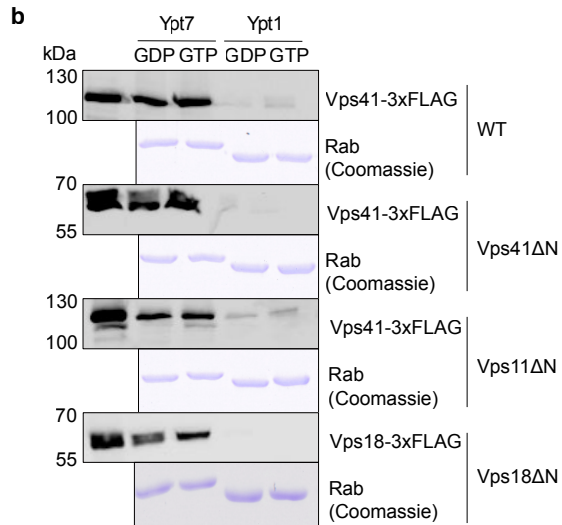

Supplement: supp [file elife_poa_e80901_Figure_1_figure_supplement_4.pdf › elife_poa_e80901_Figure_1_figure_supplement_4.pdf]

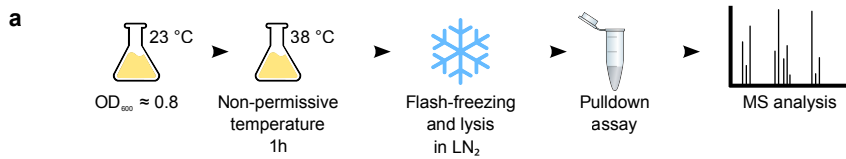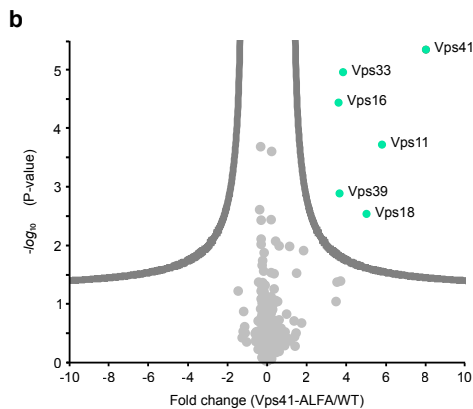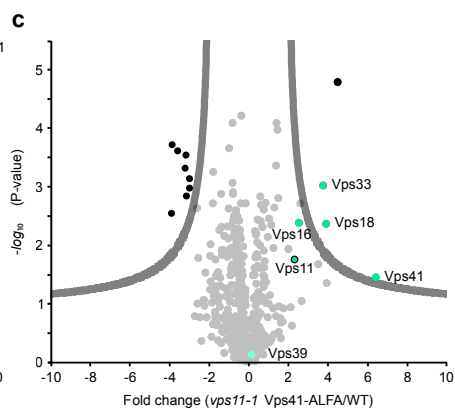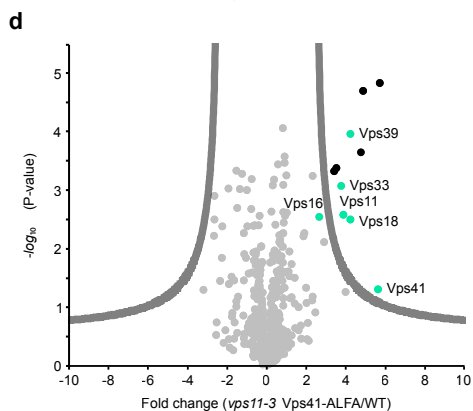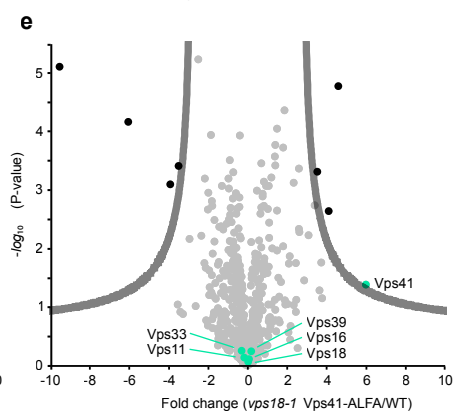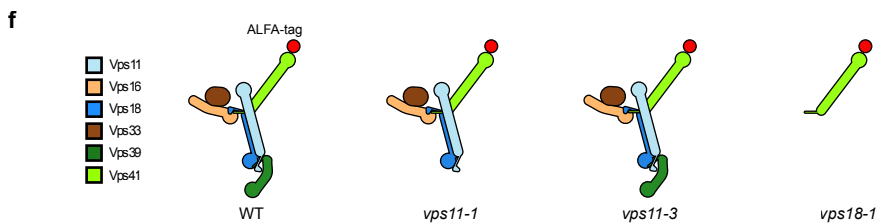

Supplement: supp [file elife_poa_e80901_Figure_2_figure_supplement_2.pdf › elife_poa_e80901_Figure_2_figure_supplement_2.pdf]

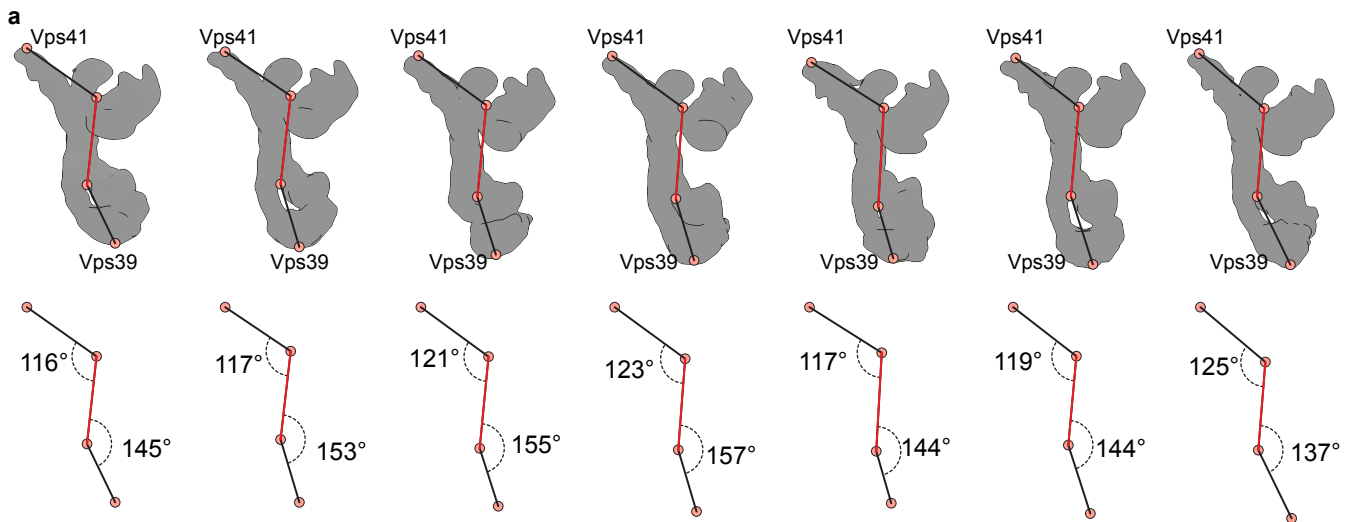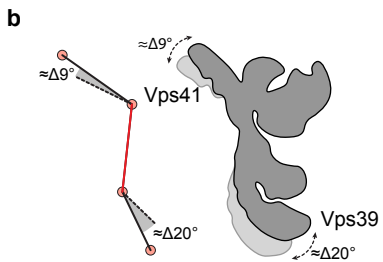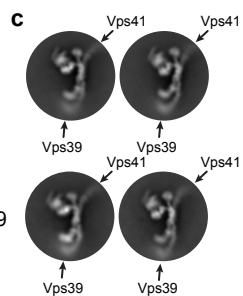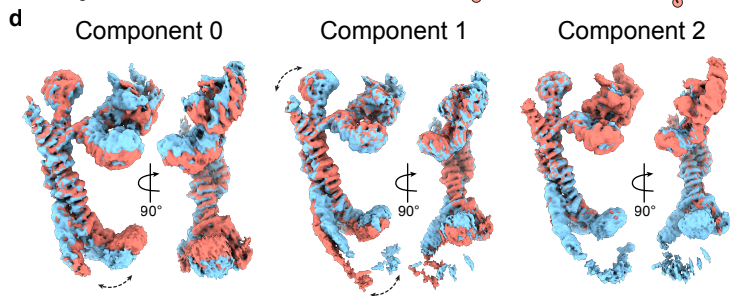

Supplement: supp [file elife_poa_e80901_Figure_2_figure_supplement_3.pdf › elife_poa_e80901_Figure_2_figure_supplement_3.pdf]

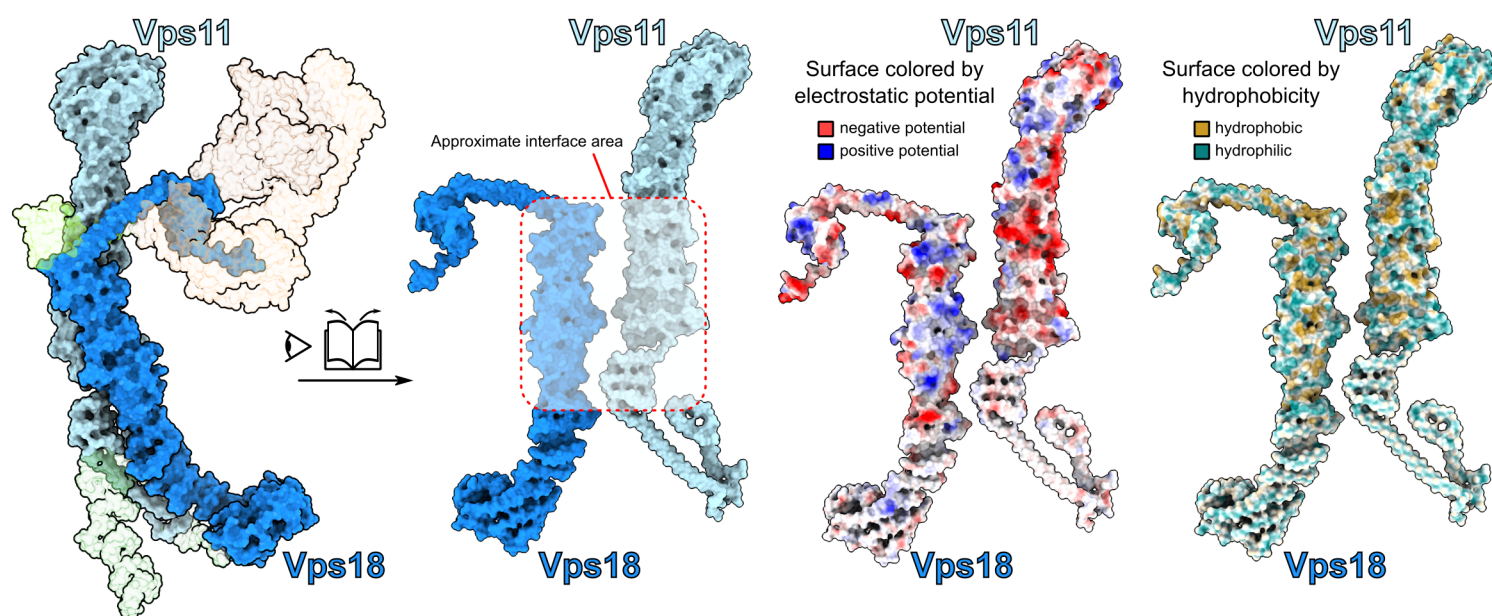

Supplement: supp [file elife_poa_e80901_Figure_2_figure_supplement_4.pdf › elife_poa_e80901_Figure_2_figure_supplement_4.pdf]

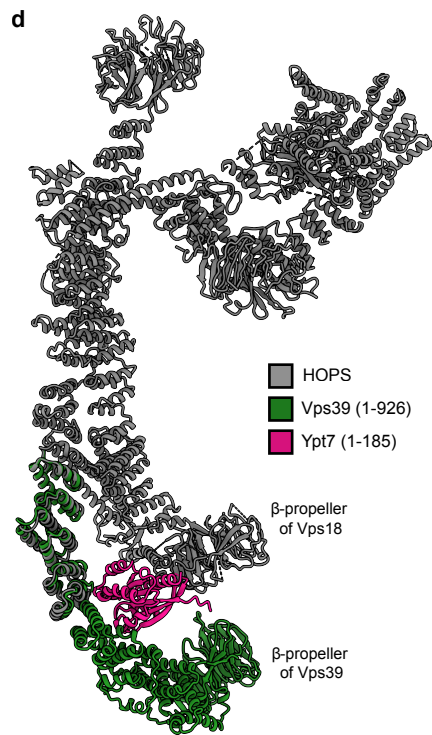

Supplement: supp [file elife_poa_e80901_Figure_3_figure_supplement_1.pdf › elife_poa_e80901_Figure_3_figure_supplement_1.pdf]

a

## Vps11

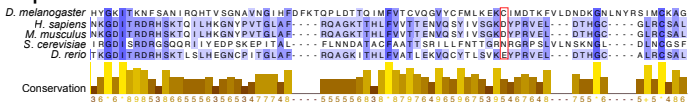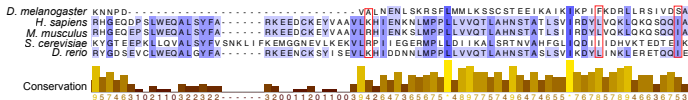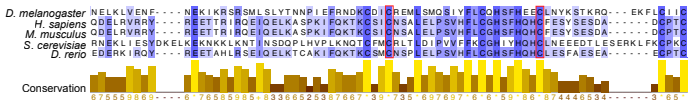

## Vps16

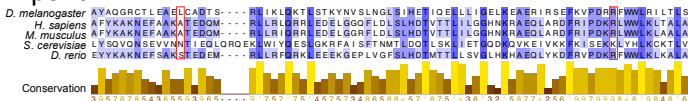

## Vps18

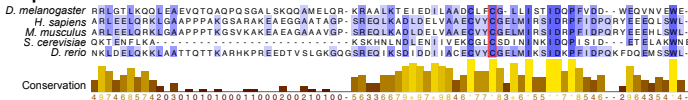

## Vps33

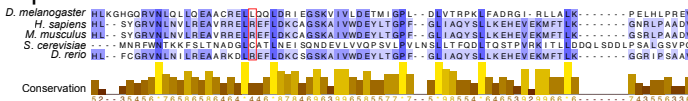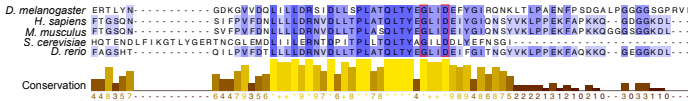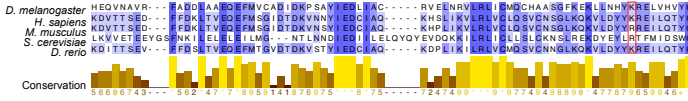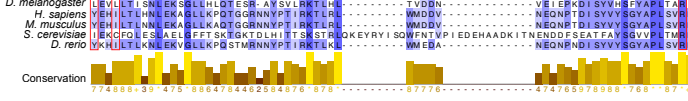

b

Vps11 Vps16 Vps18  
 Vps33 Vps39 Vps41

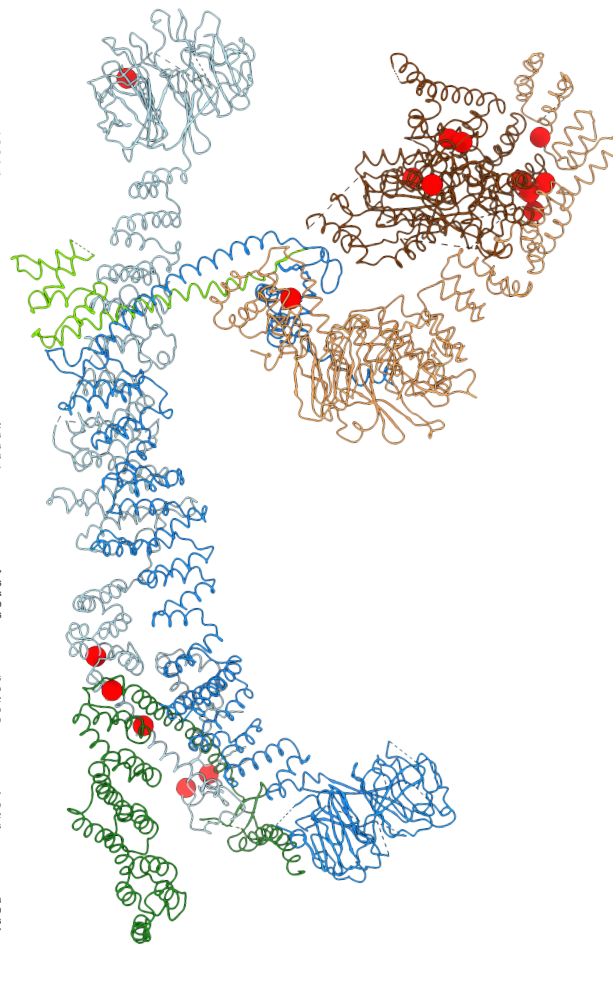

Supplement: supp [file elife_poa_e80901_Figure_4_figure_supplement_1.pdf › elife_poa_e80901_Figure_4_figure_supplement_1.pdf]
